# Supplementary material for: Combined catalyst–pathway design for efficient and green urea synthesis
Source: Royal Society of Chemistry journal article supplement (doi:10.1039/d5gc04601g), 2025-01-01
Supplement: d5gc04601g1.pdf [file d5gc04601g1.pdf]

## Supporting Information

### **Combined catalyst-pathway design for efficient and green urea synthesis**

Zhuohang Li, Xuezi Xing, Ruichao Zhang, Xue Zeng\*, Ke Chu\*  
School of Materials Science and Engineering, Lanzhou Jiaotong University, Lanzhou  
730070, China

\*Corresponding author. E-mail: zengxue@lztu.edu.cn (X. Zeng),  
chuk630@mail.lztu.cn (K. Chu)

## Experimental Section

### Materials

All the reagents were of analytical grade and were used as received without further purification.  $\text{TiO}_2$  ( $\geq 99.9\%$ ),  $\text{AgNO}_3$  ( $\geq 99.0\%$ ),  $\text{C}_4\text{H}_6\text{N}_2$  ( $\geq 99.9\%$ ),  $\text{CH}_4\text{O}$  ( $\geq 99.9\%$ ),  $\text{NaOH}$  ( $\geq 96.0\%$ ),  $\text{C}_7\text{H}_6\text{O}_3$  ( $\geq 99.5\%$ ),  $\text{KOH}$  ( $\geq 99.9\%$ ),  $\text{KHCO}_3$  ( $\geq 99.9\%$ ),  $\text{NH}_4\text{Cl}$  ( $\geq 99.5\%$ ),  $\text{C}_6\text{H}_5\text{Na}_3\text{O}_7 \cdot 2\text{H}_2\text{O}$  ( $\geq 99.0\%$ ),  $\text{C}_5\text{FeN}_6\text{Na}_2\text{O} \cdot 2\text{H}_2\text{O}$  ( $\geq 99.0\%$ ), urease,  $\text{NaClO}$  ( $\geq 99.9\%$ ) and Nafion (5 wt%) were provided from Sigma-Aldrich Chemical Reagent Co, Ltd.  $\text{H}_2\text{SO}_4$  (98%),  $\text{N}_2\text{H}_4 \cdot \text{H}_2\text{O}$  ( $\geq 99.9\%$ ) and  $\text{C}_2\text{H}_5\text{OH}$  (99.0%) were purchased from Sigma-Aldrich Chemical Reagent Co, Ltd.  $\text{CO}_2$  ( $\geq 99.999\%$ ) and Ar ( $\geq 99.999\%$ ) are provided from Lanzhou Xinwanke, Co, Ltd.

### Synthesis of $\text{Ag}_1/\text{TiO}_{2-x}$

All the chemicals were used as received without further purification. 2 g of pure  $\text{TiO}_2$  powder was dispersed in 40 mL of 5 M  $\text{NaOH}$  solution under stirring for 1 h. The suspension was then hydrothermally treated in a Teflon-lined autoclave at  $180^\circ\text{C}$  for 24 h. After cooling, the precipitates were collected, dried and further annealed in Ar atmosphere at  $500^\circ\text{C}$  for 2 h. The obtained  $\text{TiO}_{2-x}$  was re-dispersed in an aqueous solution containing dissolved  $\text{AgNO}_3$  and maintained for 2 h. The resulting sediments were then collected, washed thoroughly and dried to obtain  $\text{Ag}_1/\text{TiO}_{2-x}$ .

### Electrochemical experiments in H-type cell

Electrochemical measurements were conducted utilizing a CHI-760E electrochemical workstation. The experimental setup comprised a three-electrode cell configuration, consisting of an  $\text{Ag}_1/\text{TiO}_{2-x}$  working electrode, an  $\text{Ag}/\text{AgCl}$  reference electrode, and a Pt foil counter electrode. The catalyst slurry was prepared by dissolving 25 mg of catalyst in 3 mL of isopropanol followed by the addition of 20  $\mu\text{L}$  of Nafion ionomer solution (5 wt%  $\text{H}_2\text{O}$  solution). The catalyst slurry was slowly dripped onto carbon paper (Sigracet 29 BC) to obtain  $\sim 0.5 \text{ mg cm}^{-2}$  of catalyst loading as electrode. All potentials were calibrated with respect to a reversible hydrogen electrode (RHE) using the formula  $E (\text{V vs. RHE}) = E (\text{V vs. Ag/AgCl}) + 0.198 \text{ V} + 0.059 \times \text{pH}$ . The catholyte was a solution containing gases generated through plasma

and 0.1 M  $\text{KHCO}_3$ , while the anolyte consisted of a 1 M KOH solution within an H-type two-compartment electrochemical cell separated by a Nafion 211 membrane. Before utilizing the Nafion membrane, a pretreatment procedure was carried out. The membrane was heated in a 5%  $\text{H}_2\text{O}_2$  aqueous solution at  $80^\circ\text{C}$  for 1 h, followed by rinsing with deionized water at  $80^\circ\text{C}$  for an additional 1 h. The catholyte was purged with  $\text{CO}_2$  or Ar prior to the electrochemical experiments. After electrolysis for 1 h, the produced urea was quantitatively determined by the urease decomposition method.

### **Electrochemical experiments in flow cell**

Flow cell measurements were conducted using a commercially available flow cell electrolyser (101017, Gaoss Union Technology Co, LTD). In flow cell, the anodic and cathodic chambers were separated by a Nafion 211 proton exchange membrane (PEM). For the electrochemical measurements, a gas diffusion electrode (GDE) was used as the working electrode, Ni foams served as the counter electrode, and an Ag/AgCl electrode was employed as the reference electrode. During the electrolysis,  $\text{CO}_2$  gas was fed from the no-catalyst side of the GDE at a flow rate of 20 s.c.c.m., and both catholyte and anolyte were continuously cycled at a rate of  $20 \text{ mL min}^{-1}$  under pump drive. After electrolysis at specified potentials for 1 h, the produced urea was quantitatively determined by the urease decomposition method.

### **Plasma-assisted air-to- $\text{NO}_x$ conversion**

A pulsed high-voltage plasma discharge (PHPD) system was employed to activate and dissociate air molecules for  $\text{NO}_x$  generation. The system primarily comprised three key components: power regulation module, plasma reactor and gas flow control system. The power regulation module was powered by a low-voltage direct current (DC) power supply and integrated with a high-voltage module (Model: DC High-Voltage Modules-150KV, Guangao Technology (Wuhan) Co., Ltd) to amplify the voltage. The output potential was precisely measured using a high-voltage voltmeter (Model: 69C17, Wenzhou Telun Electric Co., Ltd). The plasma reactor comprised a glass tube (2 mm in inner diameter), two copper electrodes with multiple parallel microcolumns, along with a gas inlet and outlet for feeding and discharging gases, respectively. Ambient air was directly introduced into the plasma reactor at a

controlled volumetric flow rate regulated by a gas flow control system (Model: ACU10FD-XS, Beijing Precision Technology Co., Ltd). After a period of plasma discharge, the outlet  $\text{NO}_x$  gas was absorbed in an Erlenmeyer flask containing 1 M KOH solution, where  $\text{NO}_x$  was converted into  $\text{NO}_x$  ions ( $\text{NO}_2^-/\text{NO}_3^-$ ). The resulting  $\text{NO}_2^-$  and  $\text{NO}_3^-$  concentrations were subsequently quantified with ultraviolet-visible (UV-Vis) absorption spectroscopy.

### **Characterizations**

X-ray diffraction (XRD) pattern was collected on a Rigaku D/max 2400 diffractometer with Cu  $K\alpha$  radiation ( $\lambda = 1.5418 \text{ \AA}$ , 40 kV). Transmission electron microscopy (TEM) and high-resolution transmission electron microscopy (HRTEM) were recorded on a Tecnai G<sup>2</sup> F20 microscope. Aberration-corrected high-angle annular dark-field scanning transmission microscopy (AC-STEM) was performed on a Titan Cubed Themis G<sup>2</sup> 300 microscope. Electron paramagnetic resonance (EPR) measurements were conducted on a Bruker ESP-300 spectrometer. Operando Raman spectroscopy analysis was carried out on a confocal Raman spectrometer (Horiba HR-800) with a wavelength of 532 nm. Operando Fourier-transform infrared (FTIR) spectroscopy was performed on a Nicolet 6700 FTIR spectrometer. Online differential electrochemical mass spectrometry (DEMS, QAS 100) was performed by QAS 100 spectrometer.

### **Determination of urea**

Urea concentration was detected via urease decomposition method<sup>1</sup>. Typically, 0.2 mL of urease solution with concentration of 5 mg mL<sup>-1</sup> was added into 2 mL of urea electrolyte, and then reacted at 37°C in constant temperature shaker for 40 min. Urea was decomposed by urease into  $\text{CO}_2$  and two  $\text{NH}_3$  molecules. After the decomposition,  $\text{NH}_3$  concentration of urea electrolyte with urease ( $c_{\text{urease}}$ ) was detected via above indophenol blue method. Meanwhile,  $\text{NH}_3$  concentration contained in urea electrolyte without urease ( $c_{\text{NH}_3}$ ) was also quantified by indophenol blue

method. Urea concentration ( $c_{\text{urea}}$ ) in electrolyte were calculated by the following equation:

$$c_{\text{urea}} = (c_{\text{urease}} - c_{\text{NH}_3})/2 \quad (1)$$

The urea yield rate and  $\text{FE}_{\text{urea}}$  were calculated by the following equation:

$$\text{Urea yield rate (mmol h}^{-1} \text{ g}^{-1}) = \frac{c_{\text{urea}} \times V}{60.06 \times t \times m} \quad (2)$$

$$\text{FE}_{\text{urea}} (\%) = \frac{12 \times F \times c_{\text{urea}} \times V}{60.06 \times Q} \times 100\% \quad (3)$$

where  $c_{\text{urea}}$  ( $\text{mg mL}^{-1}$ ) is the measured urea concentration,  $V$  (mL) is the volume of the electrolyte,  $t$  (h) is the reduction time,  $m$  (g) is the mass loading of the catalyst on CC,  $F$  ( $96500 \text{ C mol}^{-1}$ ) is the Faraday constant,  $Q$  (C) is the quantity of applied electricity.

### Determination of $\text{NH}_3$

$\text{NH}_3$  in electrolyte was quantitatively determined by the indophenol blue method<sup>2</sup>. Typically, 2 mL of electrolyte was removed from the electrochemical reaction vessel and diluted with deionized water. Then 2 mL of diluted solution was removed into a clean vessel followed by sequentially adding NaOH solution (2 mL, 1 M) containing  $\text{C}_7\text{H}_6\text{O}_3$  (5 wt.%) and  $\text{C}_6\text{H}_5\text{Na}_3\text{O}_7$  (5 wt.%), NaClO (1 mL, 0.05 M), and  $\text{C}_5\text{FeN}_6\text{Na}_2\text{O}$  (0.2 mL, 1wt.%) aqueous solution. After the incubation for 2 h at room temperature, the mixed solution was subjected to UV-vis measurement using the absorbance at 655 nm wavelength. The concentration-absorbance curves were calibrated by the standard  $\text{NH}_4\text{Cl}$  solution with a series of concentrations.

### Determination of $\text{NO}_2^-$

$\text{NO}_2^-$  in electrolyte was determined by a Griess test<sup>3</sup>. Typically, 2 mL of electrolyte was removed from the electrochemical reaction vessel and diluted with deionized water. The coloring solution was prepared by dissolving N-(1-naphthyl) ethylenediamine dihydrochloride (0.1 g), sulfonamide (1.0 g) and  $\text{H}_3\text{PO}_4$  (2.94 mL, 85%) into 50 mL of deionized water. Add 0.1 mL of coloring solution to the diluted electrolyte. After incubation for 30 min at room temperature, the mixture was

subjected to UV-vis measurements and the absorption spectrum (range 400-700 nm) was obtained. The absorbance at 540 nm was measured to determine the concentration of generated  $\text{NO}_2^-$  with a standard curve of  $\text{NaNO}_2$ .

### **Determination of $\text{NO}_3^-$**

$\text{NO}_3^-$  in electrolyte was quantitatively determined by a reported method<sup>4</sup>. The electrolyte was collected and diluted to the detection range. 2 mL of diluted electrolyte was mixed with 40  $\mu\text{L}$  of 1.0 M HCl containing 4.0  $\mu\text{L}$  of 0.8 wt% sulfamic acid. After the incubation for 20 min at room temperature, the mixed solution was subjected to UV-vis measurement using the absorbance at 220 nm wavelength. The concentration-absorbance curves were calibrated by the standard  $\text{KNO}_3$  solution with a series of concentrations.

### **Calculation details**

DFT calculations were carried out using the Cambridge sequential total energy package (CASTEP) with ultrasoft pseudopotentials. The exchange-correlation functional is evaluated using the Perdew-Burke-Ernzerhof (PBE) in the generalized gradient approximation. DFT-D3 method was employed to calculate the van der Waals (vdW) interactions. According to the experimental characterizations, the  $\text{Ag}_1/\text{TiO}_{2-x}$  (101) slab was modeled and a vacuum region of 15 Å. A vacuum region of 15 Å was used to separate adjacent slabs. The cutoff energy was set as 450 eV and the k-point meshes were set as  $2 \times 2 \times 1$ . The AIMD simulation was carried out to estimate the thermal stability, in which the NVT ensemble is chosen with the total simulation time of 5 ns at a time step of 1 fs.

The computational hydrogen electrode (CHE) model was adopted to calculate the Gibbs free energy change ( $\Delta G$ ) for each elementary step as follows:

$$\Delta G = \Delta E + \Delta E_{\text{ZPE}} - T\Delta S \quad (4)$$

where  $\Delta E$  represents the electronic energy contribution directly derived from DFT calculations.  $\Delta E_{\text{ZPE}}$  and  $T\Delta S$  denote the contributions of zero-point energy and

entropy (at 298.15 K), respectively. These values can be obtained from the NIST database for free molecules<sup>5</sup>.

Molecular dynamics (MD) simulations were performed using the Forcite module. The electrolyte system was modeled by a cubic cell with placing catalyst at the center of the cell and randomly filling 1000 H<sub>2</sub>O, 50 NO<sub>2</sub><sup>-</sup>, 50 CO<sub>2</sub> molecules, and 50 H atoms. The force field type was chosen as universal. After geometry optimization, the MD simulations were performed in an NVT ensemble (698 K) with the total simulation time of 5 ns at a time step of 1 fs.

The radial distribution function (RDF) is calculated by<sup>6</sup>:

$$g(r) = \frac{dN}{4\pi\rho r^2 dr} \quad (5)$$

where  $dN$  is the amount of molecules in the shell between the central particle  $r$  and  $r+dr$ ,  $\rho$  is the number density of NO<sub>2</sub><sup>-</sup>, CO<sub>2</sub>, H<sub>2</sub>O and H.

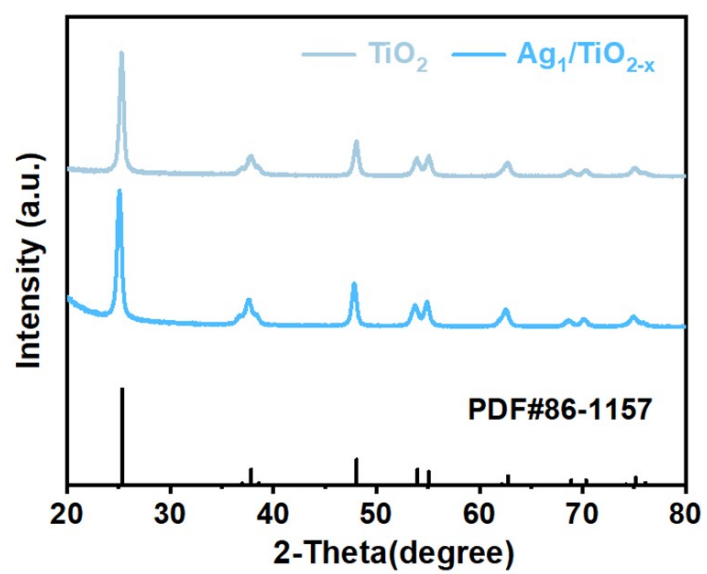

Fig. S1. XRD patterns of  $\text{Ag}_1/\text{TiO}_{2-x}$  and  $\text{TiO}_2$ .



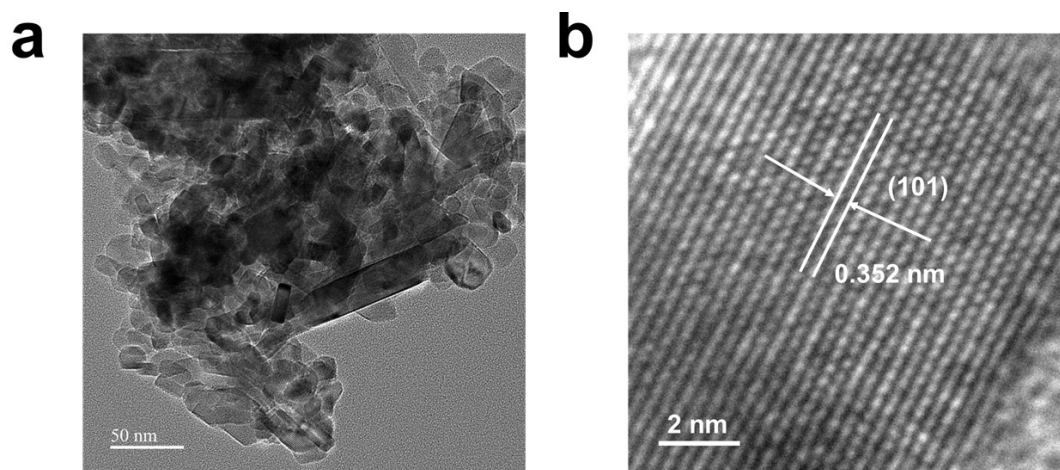

Fig. S2. (a) TEM and (b) HRTEM images of  $\text{Ag}_1/\text{TiO}_{2-x}$ .

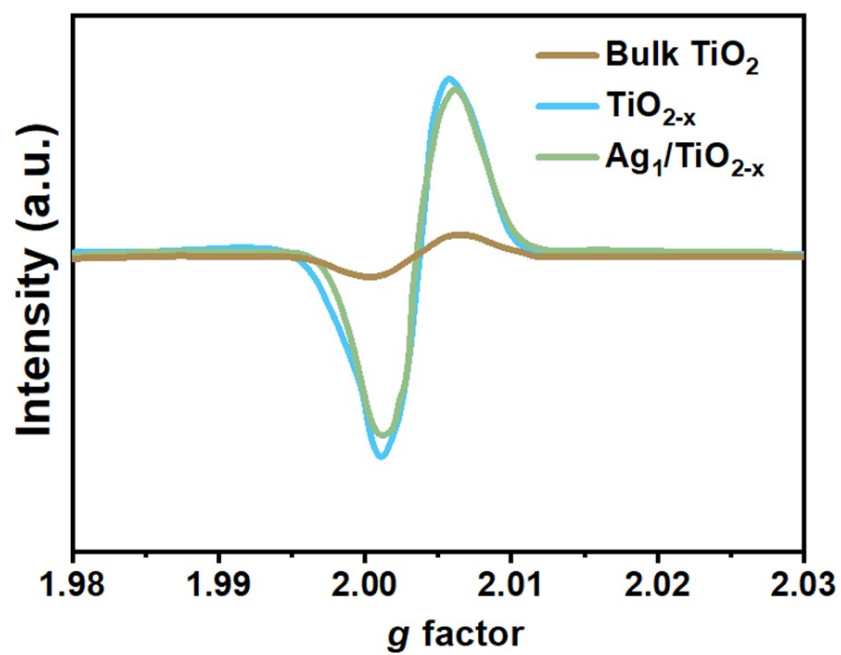

Fig. S3. EPR spectra of bulk  $\text{TiO}_2$ ,  $\text{TiO}_{2-x}$  and  $\text{Ag}_1/\text{TiO}_{2-x}$ .

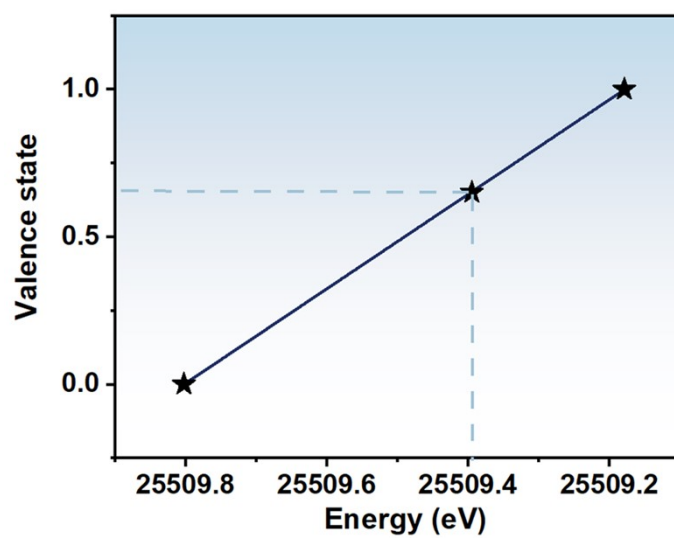

Fig. S4. XANES fitted average Ag valence state of  $\text{Ag}_1/\text{TiO}_{2-x}$ .

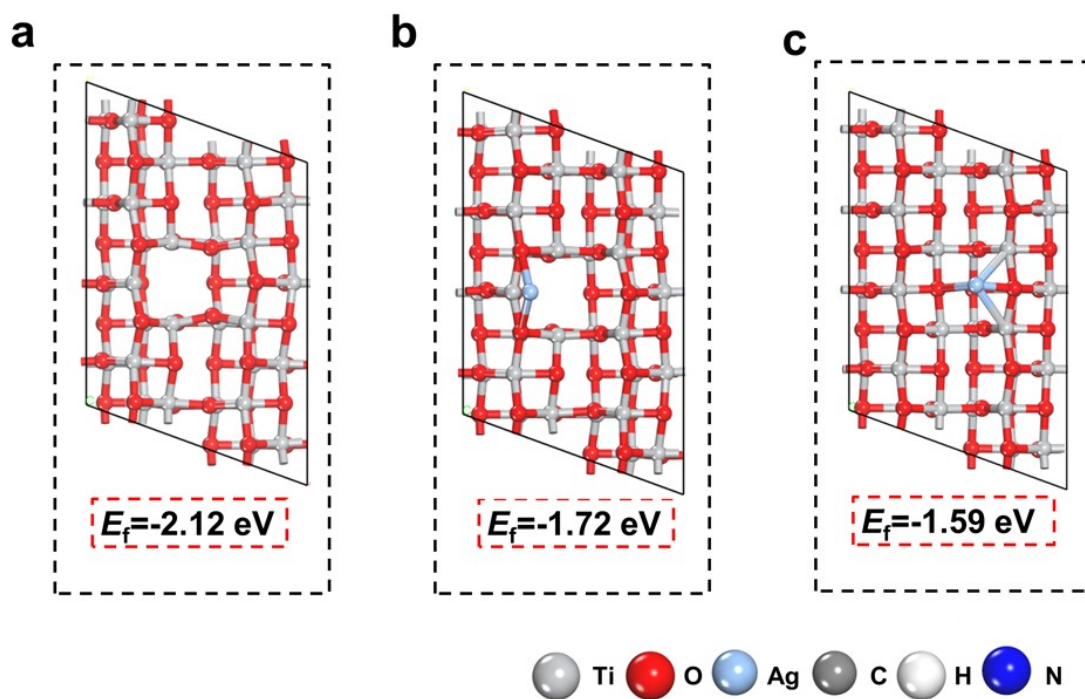

Fig. S5. Calculated formation energies ( $E_f$ ) of (a)  $\text{TiO}_{2-x}$ , (b)  $\text{Ag}_1/\text{TiO}_{2-x}$  and (c)  $\text{Ag}_1/\text{TiO}_2$ .

The calculated formation energies ( $E_f$ ) indicate that OV can be energetically favorable formed on  $\text{TiO}_2$  to form  $\text{TiO}_{2-x}$  (Fig. S5a), and  $\text{Ag}_1$  can be well anchored onto OV to generate  $\text{Ag}_1/\text{TiO}_{2-x}$  catalyst (Fig. S5b).

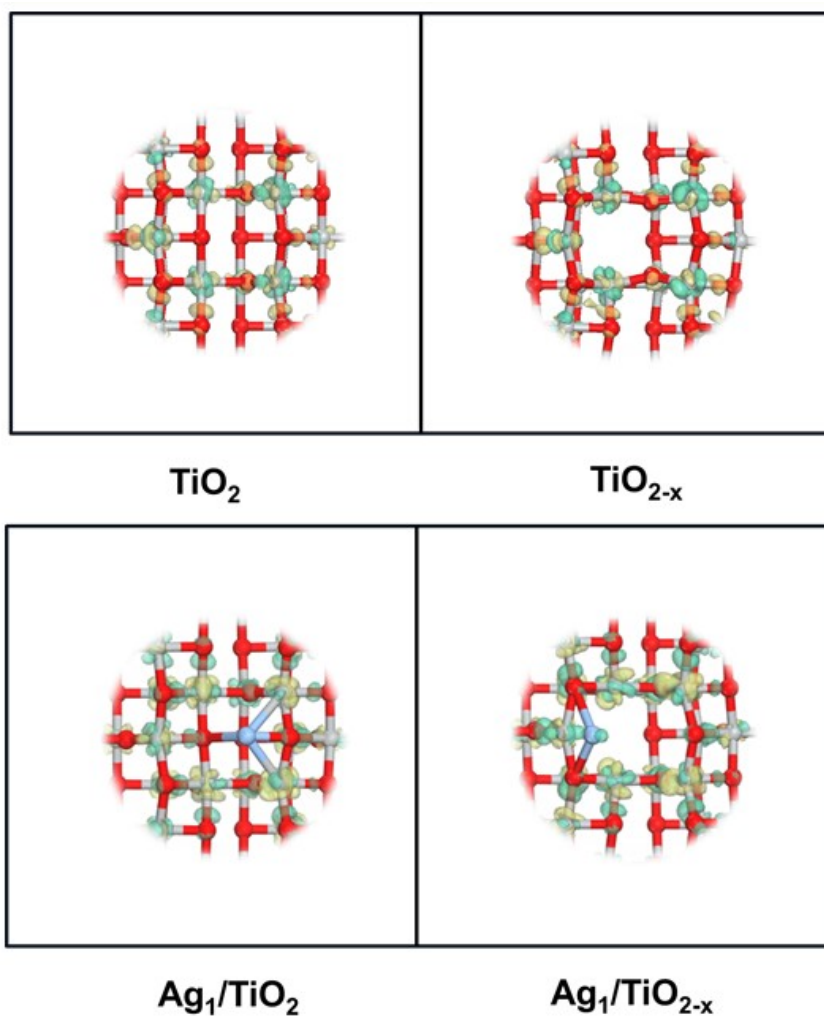

Fig. S6. Differential charge density maps of TiO<sub>2</sub>, TiO<sub>2-x</sub>, Ag<sub>1</sub>/TiO<sub>2</sub> and Ag<sub>1</sub>/TiO<sub>2-x</sub> (Yellow: accumulation and cyan: depletion).

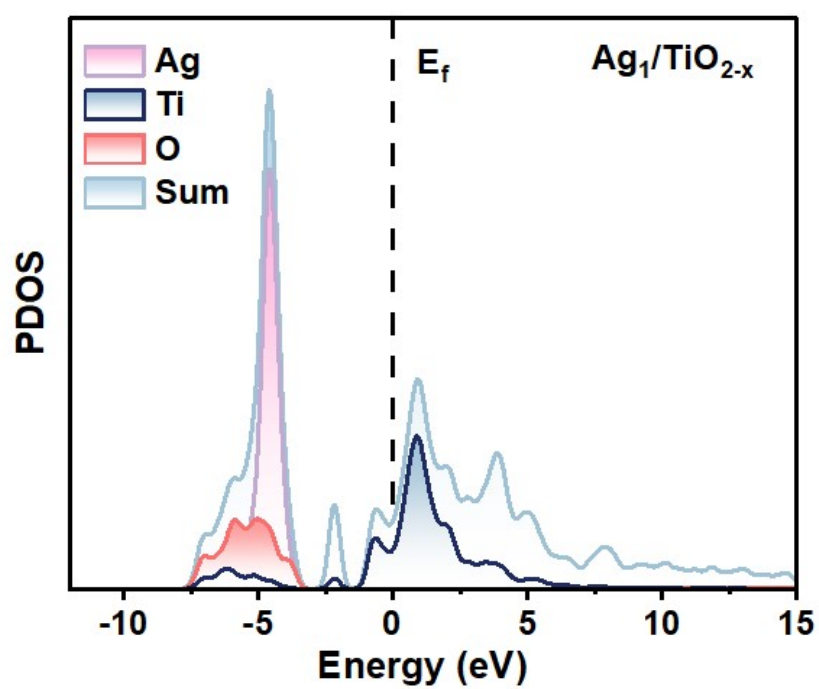

Fig. S7. PDOS profile of  $\text{Ag}_1/\text{TiO}_{2-x}$ .

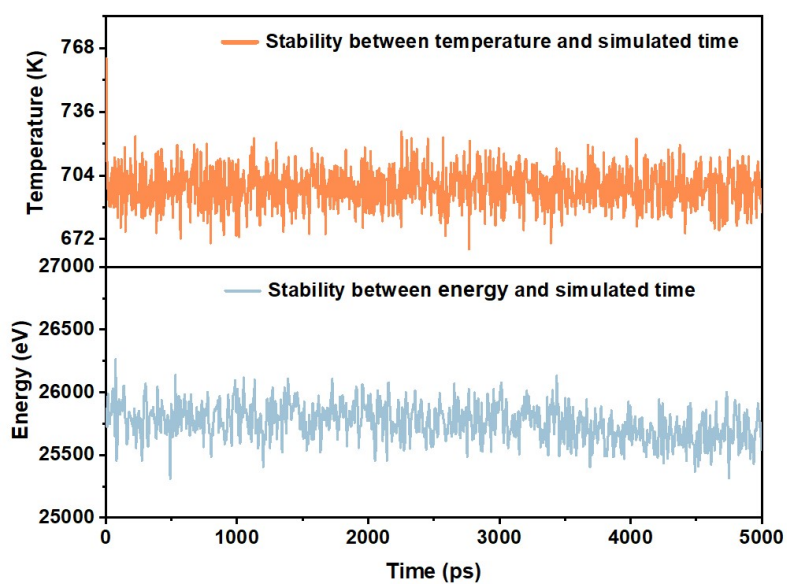

Fig. S8. AIMD simulation of the  $\text{Ag}_1/\text{TiO}_{2-x}$  atomic structure. The AIMD simulation was carried out to estimate the thermal stability, in which the NVT ensemble is chosen with the total simulation time of 5 ns at a time step of 1 fs.

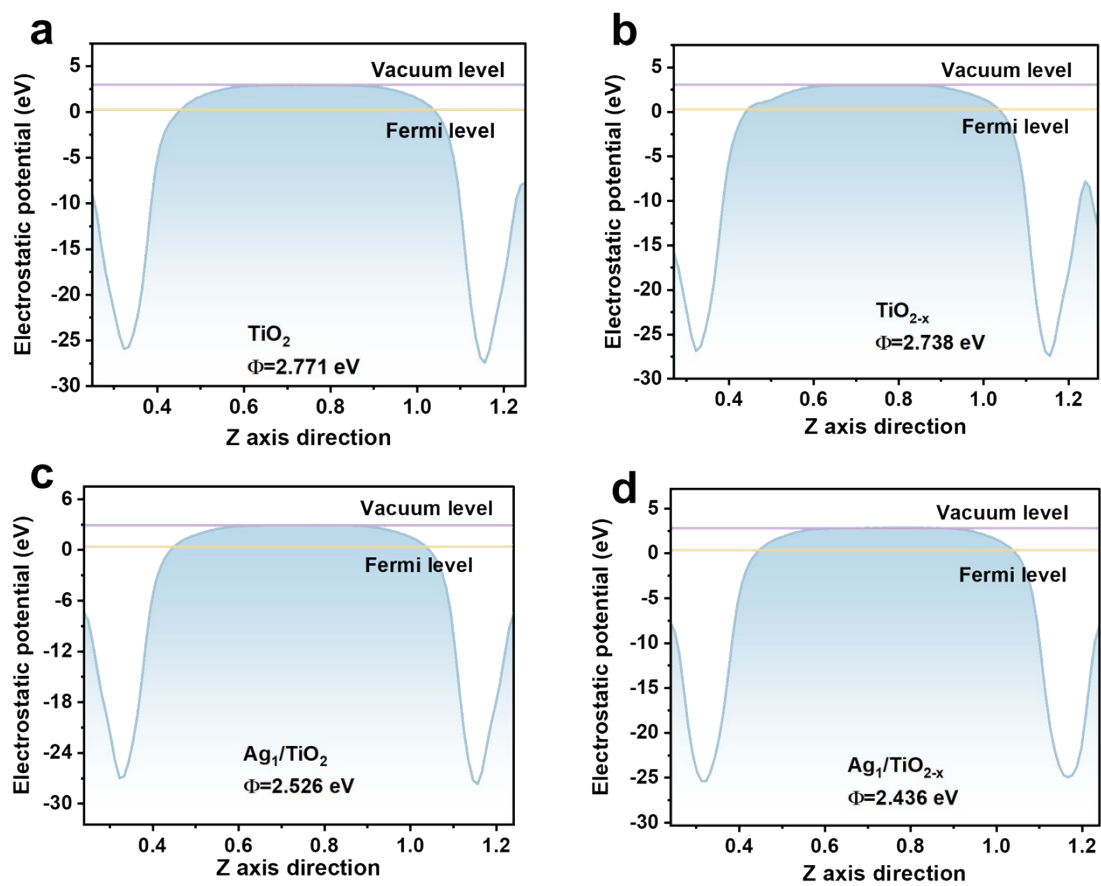

Fig. S9. Average potential profiles along c-axis direction for calculating the work functions of (a)  $\text{TiO}_2$ , (b)  $\text{TiO}_{2-x}$ , (c)  $\text{Ag}_1/\text{TiO}_2$  and (d)  $\text{Ag}_1/\text{TiO}_{2-x}$ .



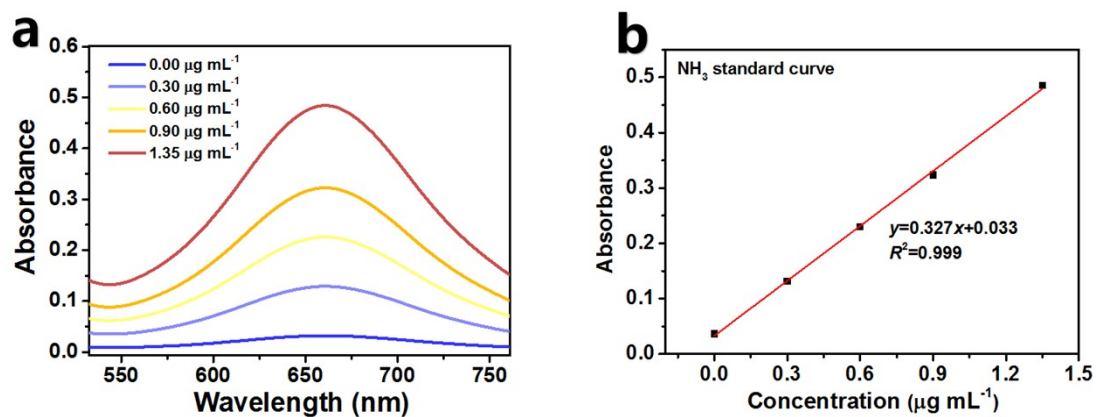

Fig S10. (a) UV-vis absorption spectra of  $\text{NH}_4\text{Cl}$  assays after incubated for 2 h at ambient conditions. (b) Calibration curve used for the calculation of  $\text{NH}_3$  concentrations.

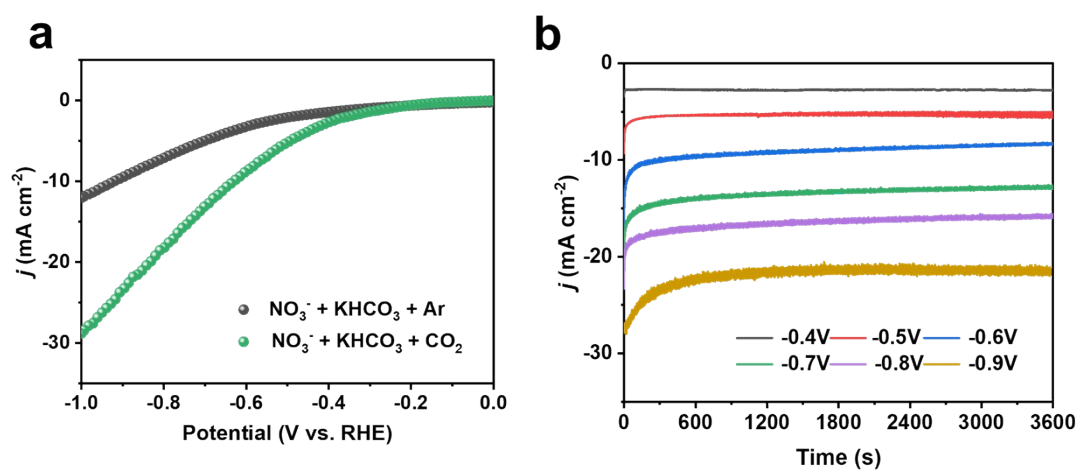

Fig S11. (a) LSV curves of  $\text{Ag}_1/\text{TiO}_{2-x}$  during the UECN electrolysis in H-cell. (b) Chronoamperometry curves at different potentials of  $\text{Ag}_1/\text{TiO}_{2-x}$  in H-cell.

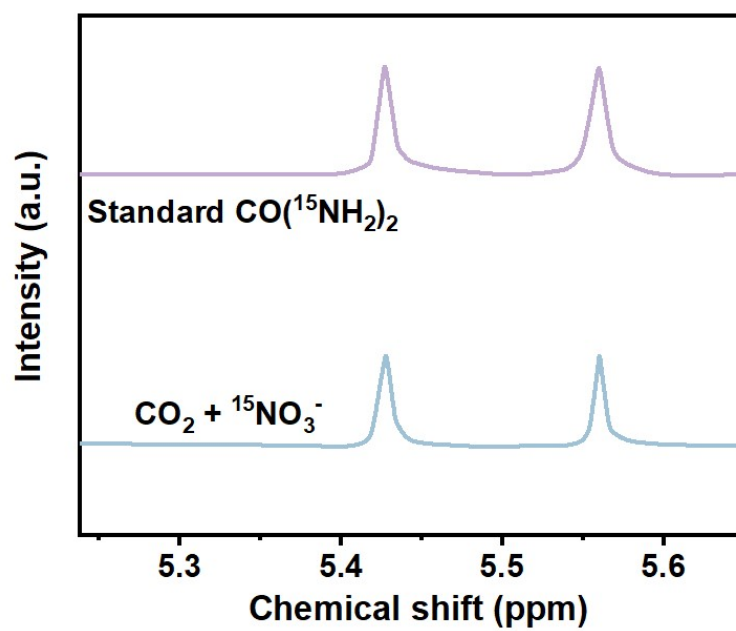

Fig. S12.  $^1\text{H}$  NMR spectra of  $\text{CO}(^{15}\text{NH}_2)_2$  standard sample and those electrolyzed in  $^{15}\text{NO}_3^-$  electrolyte at -0.7 V.

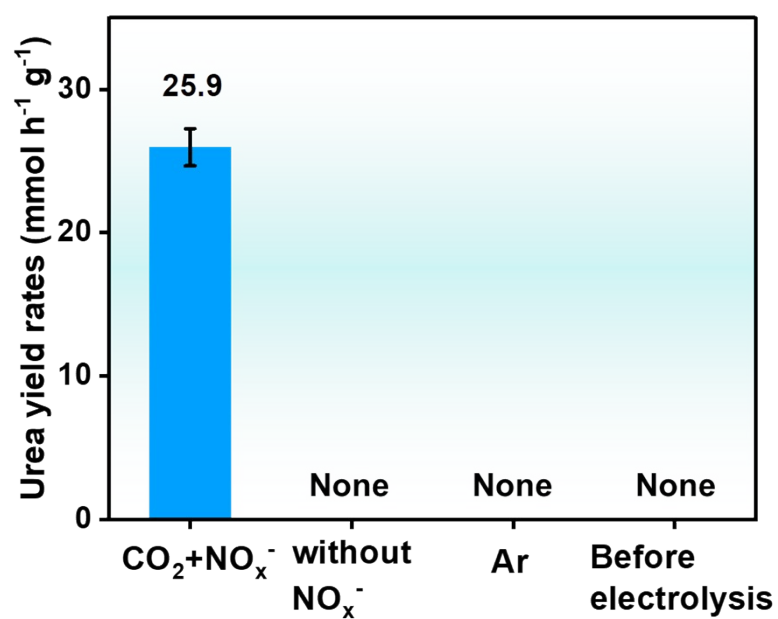

Fig. S13. Amounts of produced urea on Ag<sub>1</sub>/TiO<sub>2-x</sub> under different conditions: (1) electrolysis in NO<sub>x</sub><sup>-</sup> +CO<sub>2</sub><sup>-</sup> solution, (2) without NO<sub>x</sub><sup>-</sup>, (3) without CO<sub>2</sub>, (4) before electrolysis.

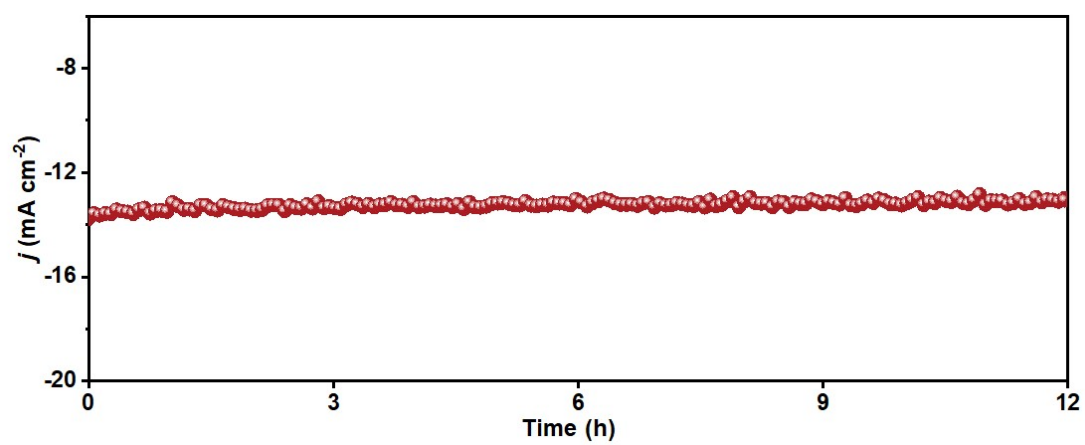

Fig. S14. Long-term test of  $\text{AgI/TiO}_{2-x}$  in H-cell at -0.7 V.

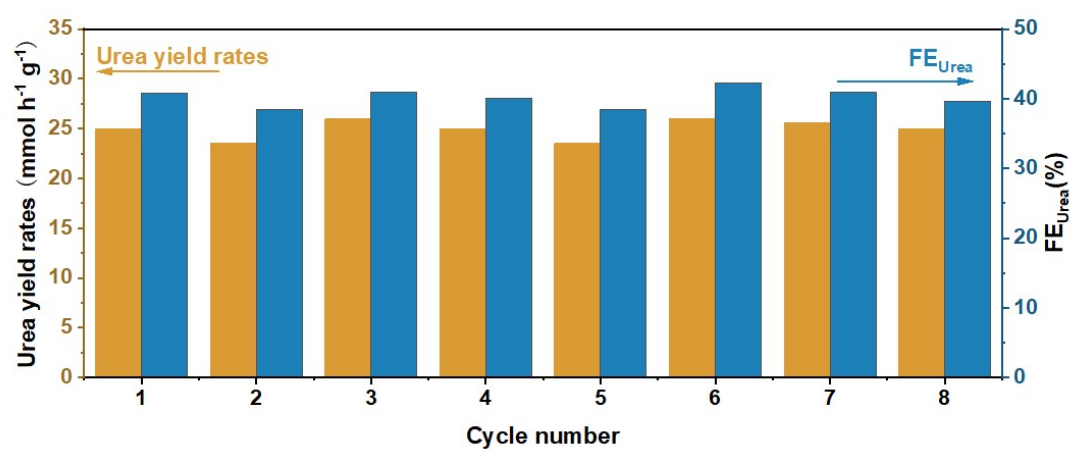

Fig. S15. Cycling test of Ag<sub>1</sub>/TiO<sub>2-x</sub> in H-cell at -0.7 V.

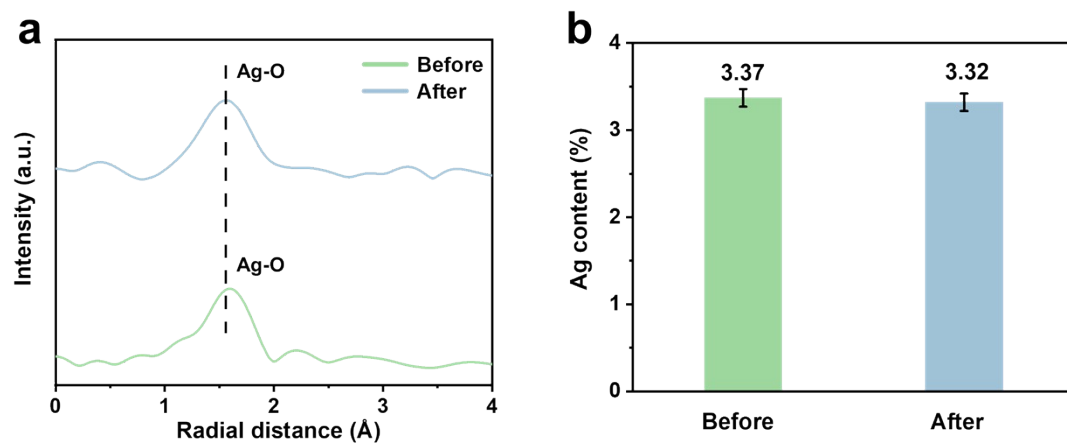

Fig. S16. (a) EXAFS spectra and (b) ICP analyses of  $\text{Ag}_1/\text{TiO}_{2-x}$  before and after long-term electrolysis test.

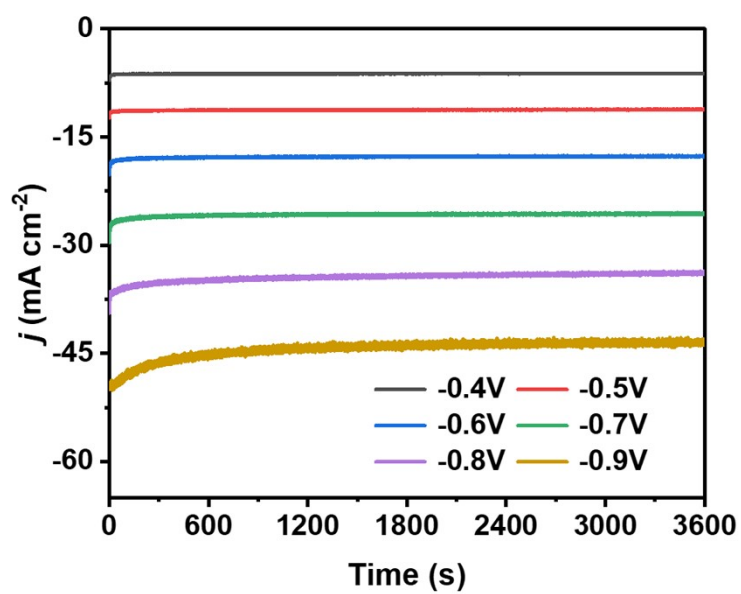

Fig. S17. Potential-dependent chronoamperometry curves of  $\text{Ag}_1/\text{TiO}_{2-x}$  after 1 h electrolysis in flow cell.



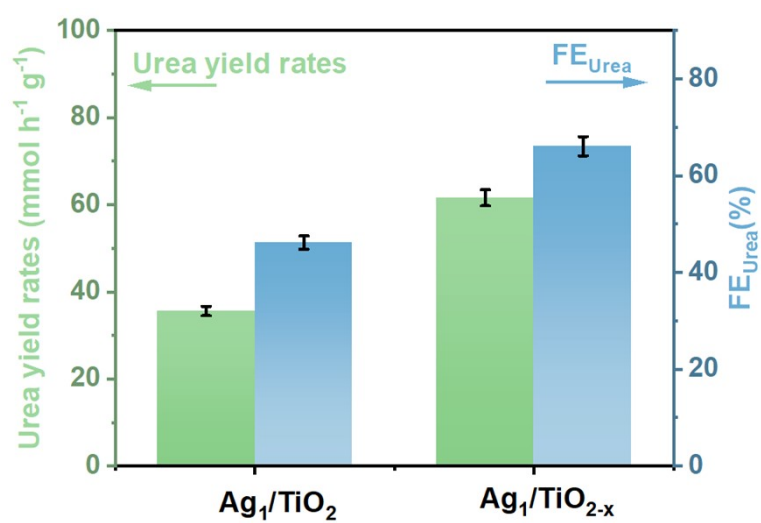

Fig. S18. UECN performance comparison between Ag<sub>1</sub>/TiO<sub>2</sub> and Ag<sub>1</sub>/TiO<sub>2-x</sub> after electrolysis for 1 h in flow cell.

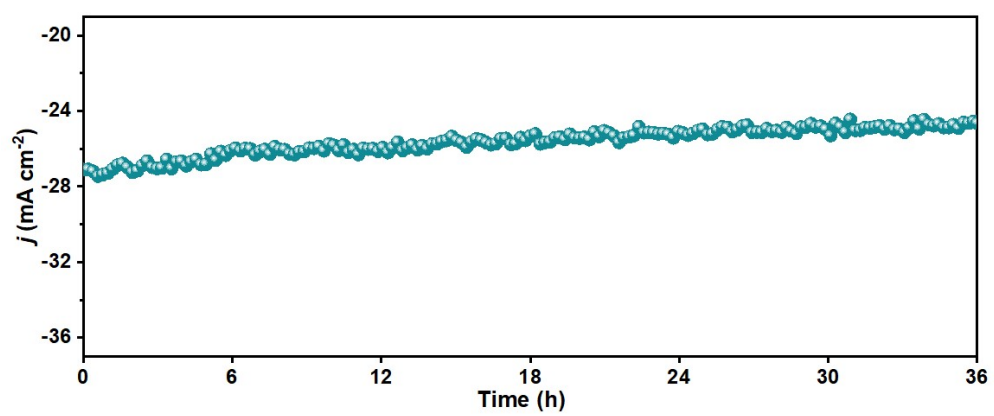

Fig. S19. Long-term test of AgI/TiO<sub>2-x</sub> in flow-cell at -0.7 V.

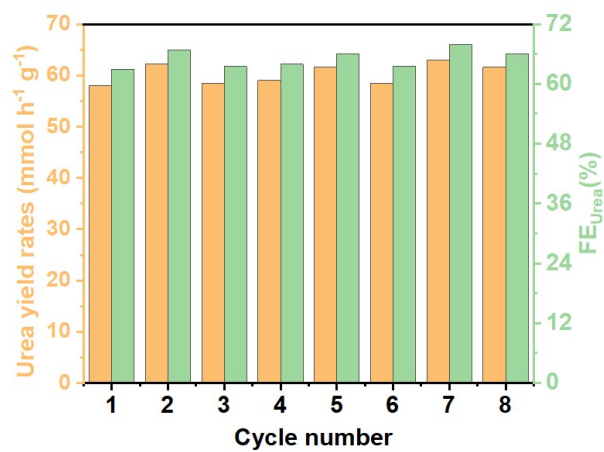

Fig. S20. Cycling test of Ag<sub>1</sub>/TiO<sub>2-x</sub> in flow cell at -0.7 V.

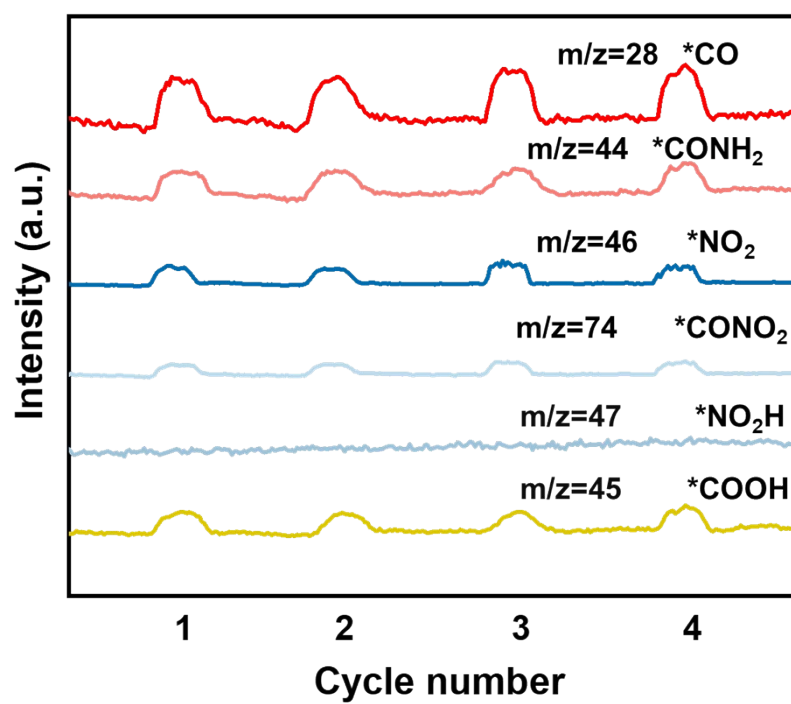

Fig. S21. Online DEMS spectra of Ag<sub>1</sub>/TiO<sub>2-x</sub> during the UECN electrolysis at -0.7 V.

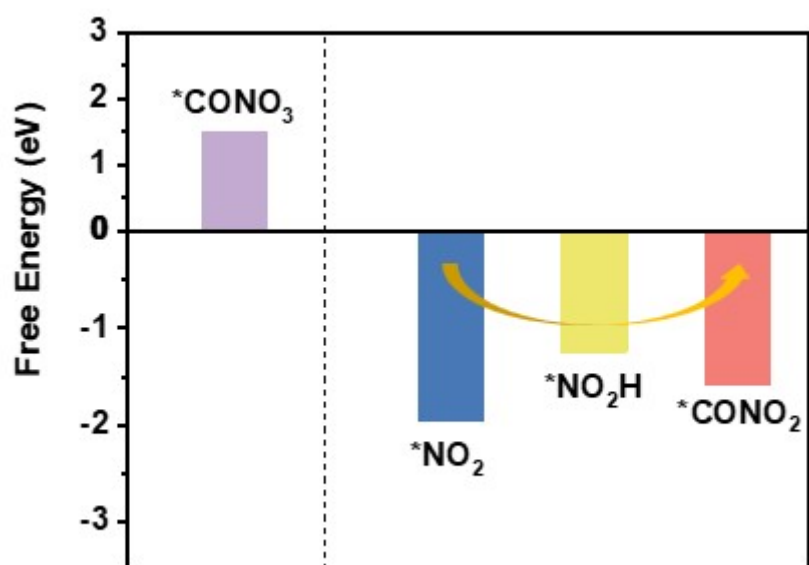

Fig. S22. Free energy diagrams of various potential N-intermediates.

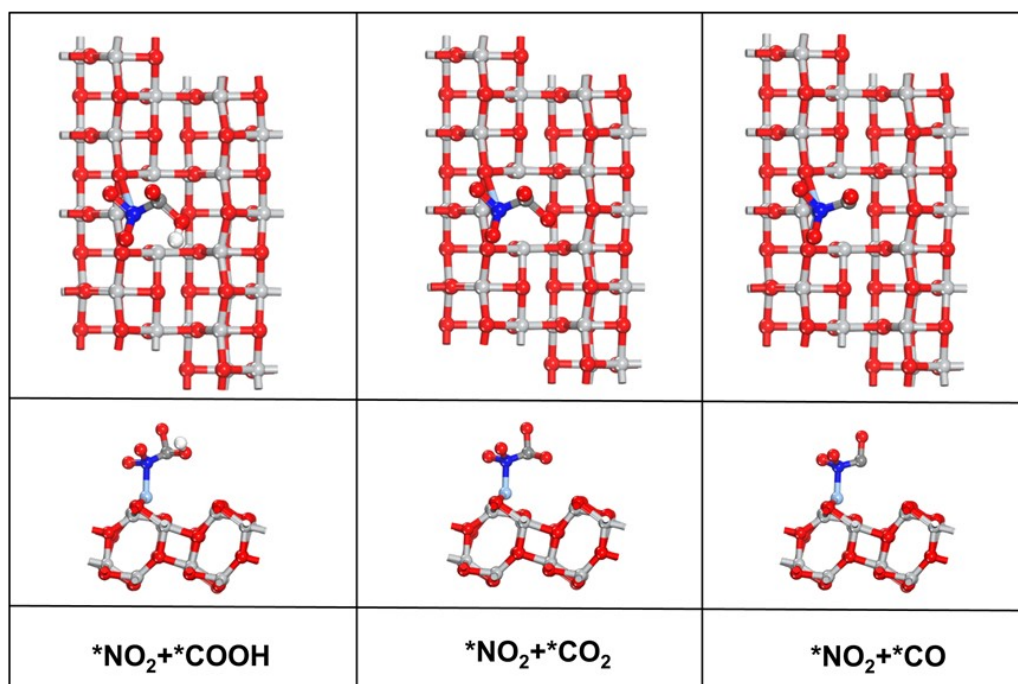

Fig. S23. Optimized structures of the coupling of \*NO<sub>2</sub> with various C-intermediates.

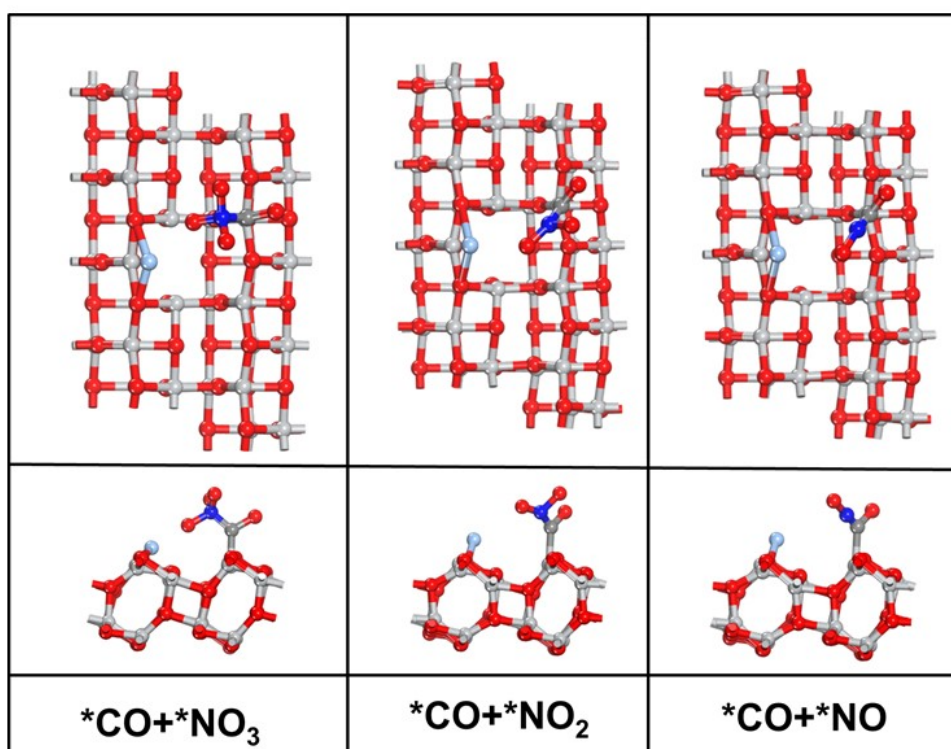

Fig. S24. Optimized structures of the coupling of \*CO with various N-intermediates.

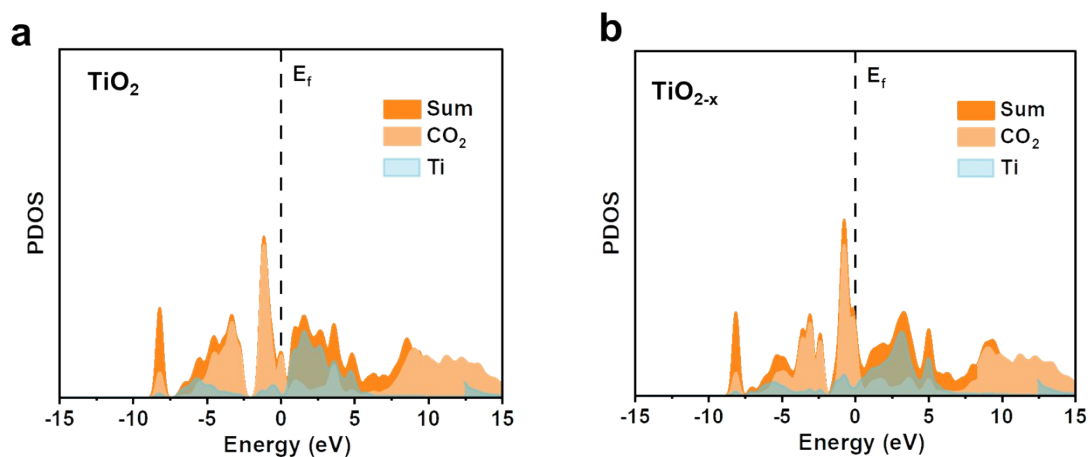

Fig. S25. PDOS profiles of adsorbed  $\text{CO}_2$  on (a)  $\text{TiO}_2$  and (b)  $\text{TiO}_{2-x}$ .

PDOS map shows pronounced  $\text{Ti}_{\text{OV}}/^*\text{CO}_2$  electronic interaction where  $\text{Ti}_{\text{OV}}$  can effectively donate electrons into the unoccupied orbitals of  $^*\text{CO}_2$ , facilitating its activation and C=O bond cleavage.



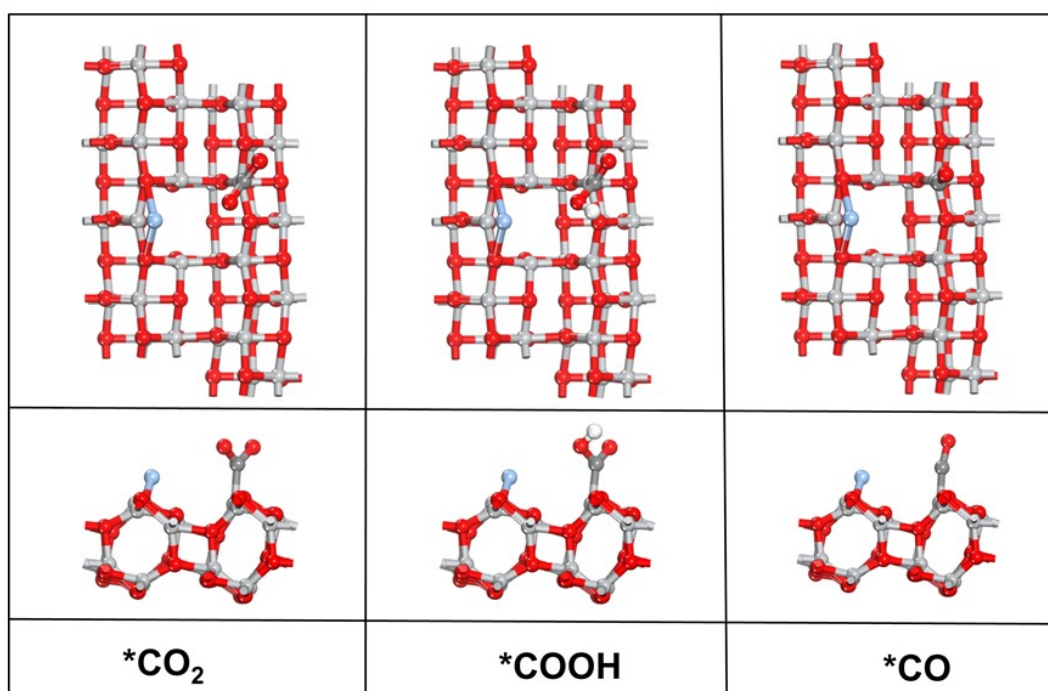

Fig. S26. Optimized structures of the reaction intermediates on Ag<sub>1</sub>/TiO<sub>2-x</sub> along CO<sub>2</sub>→\*CO pathway.

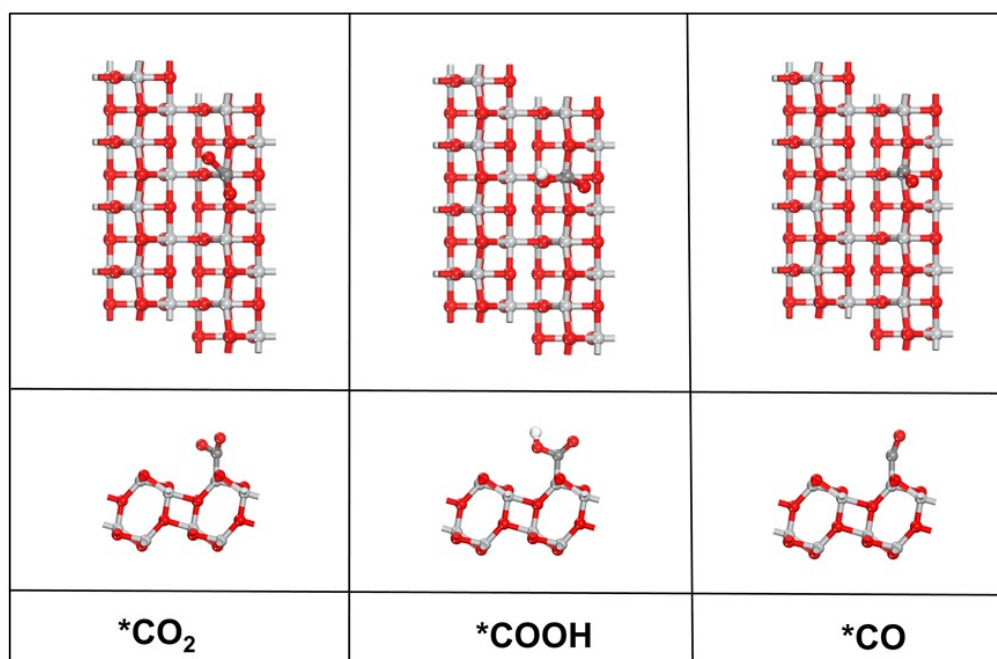

Fig. S27. Optimized structures of the reaction intermediates on TiO<sub>2</sub> along  
CO<sub>2</sub>→\*CO pathway.

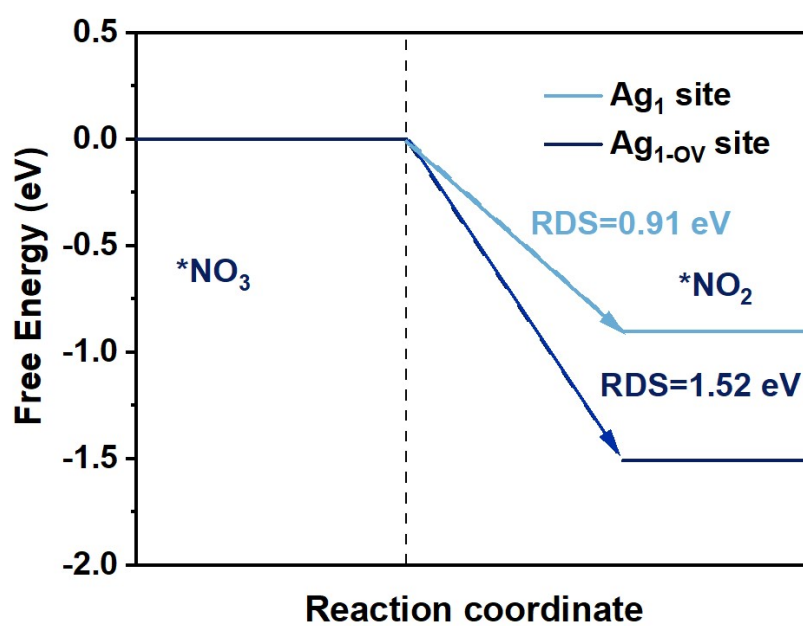

Fig. S28. Free energy diagrams of  $*NO_3 \rightarrow *NO_2$  pathways.

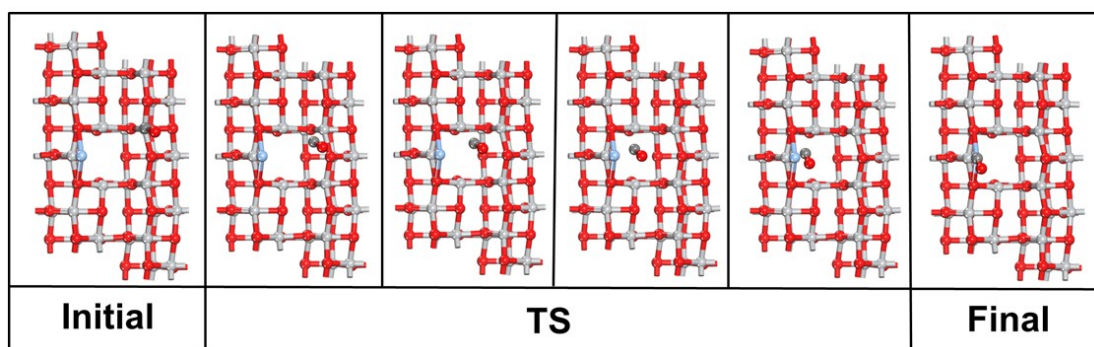

Fig. S29. Optimized structures for the TS calculation of the migration of \*CO from Ti<sub>OV</sub> site to Ag<sub>I-OV</sub> site on Ag<sub>I</sub>/TiO<sub>2-x</sub>.

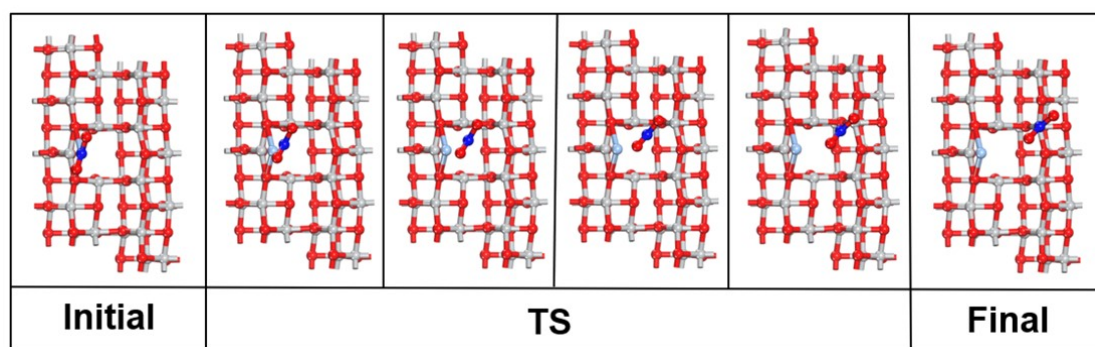

Fig. S30. Optimized structures for the TS calculation of the migration of  $\text{*NO}_2$  from  $\text{AgI-OV}$  site to  $\text{TiOV}$  site on  $\text{AgI/TiO}_{2-x}$ .

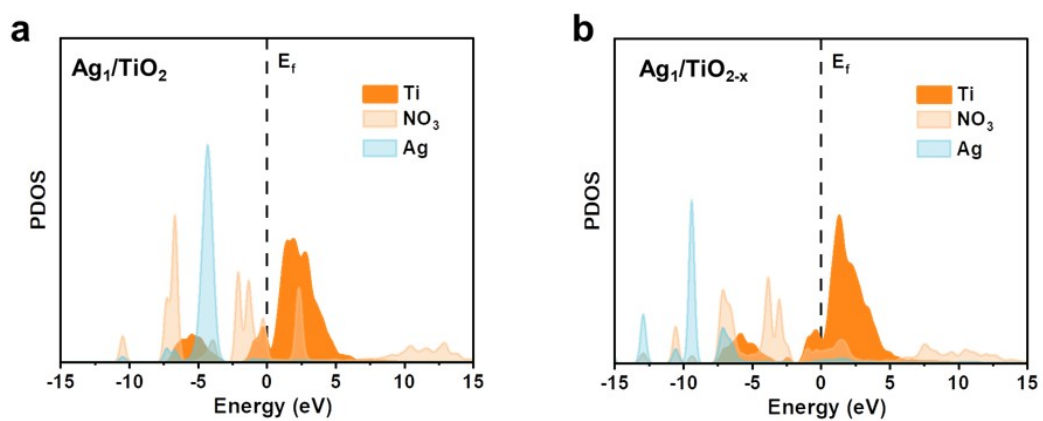

Fig. S31. PDOS profiles of adsorbed  $\text{NO}_3^-$  on (a)  $\text{Ag}_1/\text{TiO}_2$  and (b)  $\text{Ag}_1/\text{TiO}_{2-x}$ .

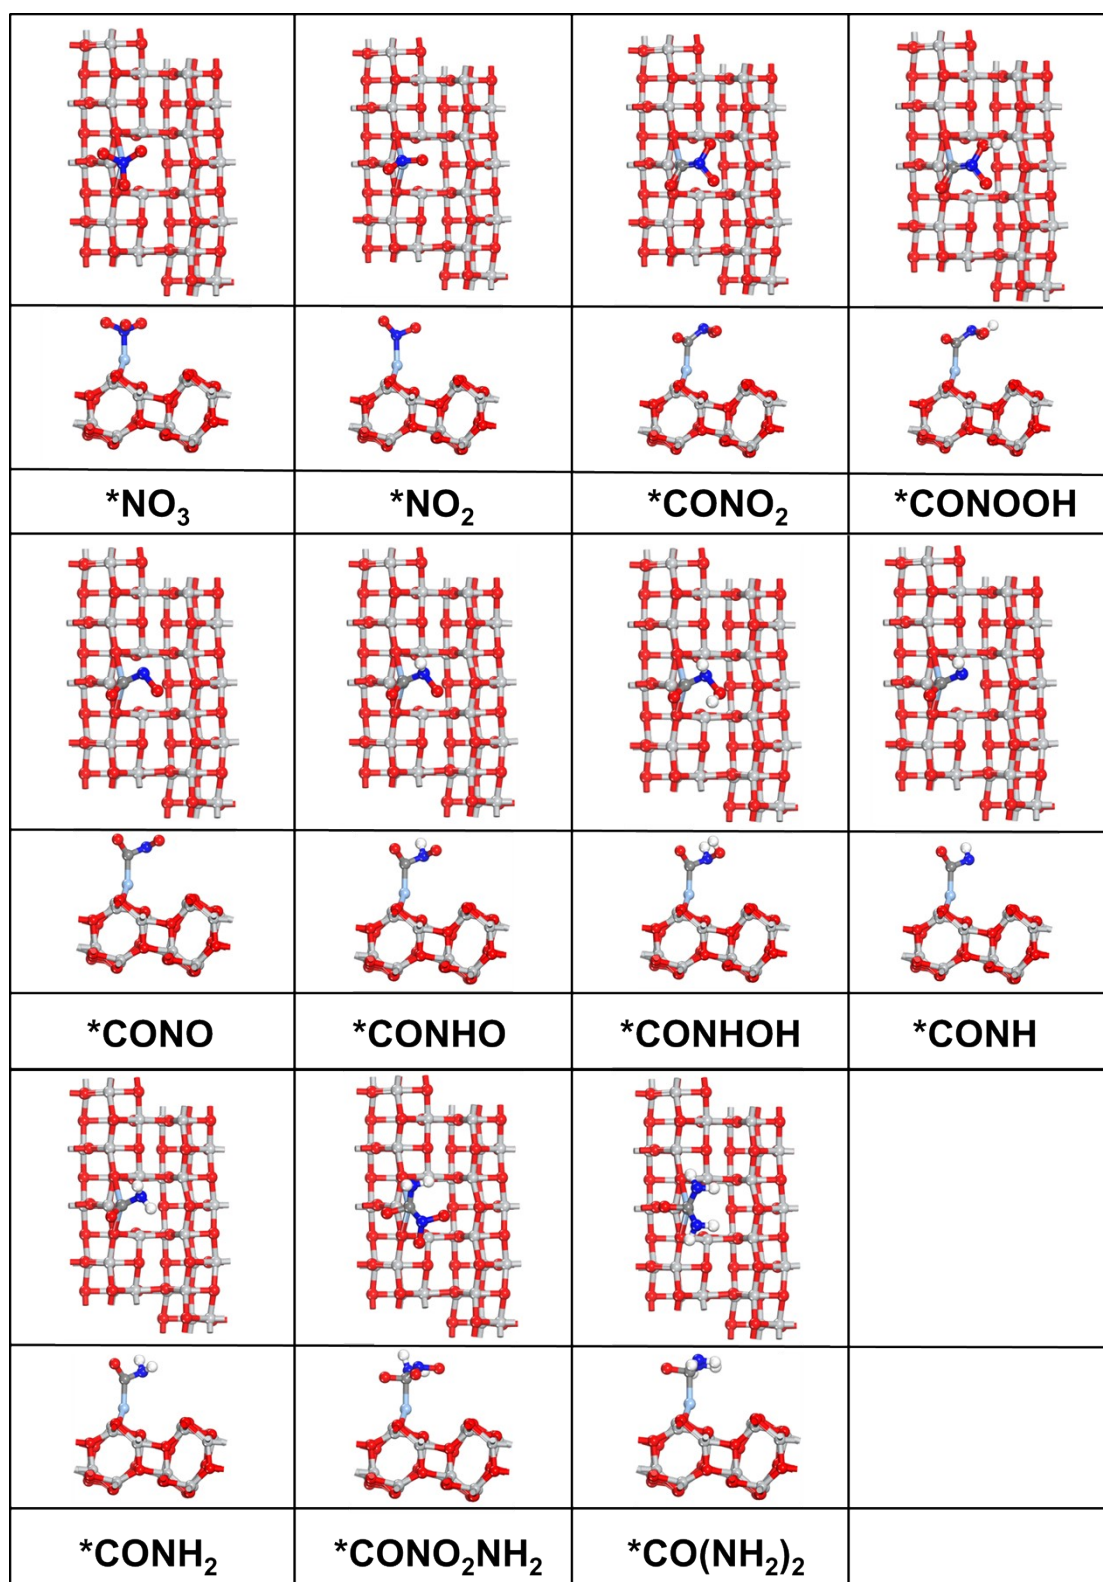

Fig. S32. Optimized structures of the reaction intermediates on Ag<sub>1</sub>/TiO<sub>2-x</sub> along

$*\text{NO}_3 \rightarrow *\text{CO}(\text{NH}_2)_2$  pathway.



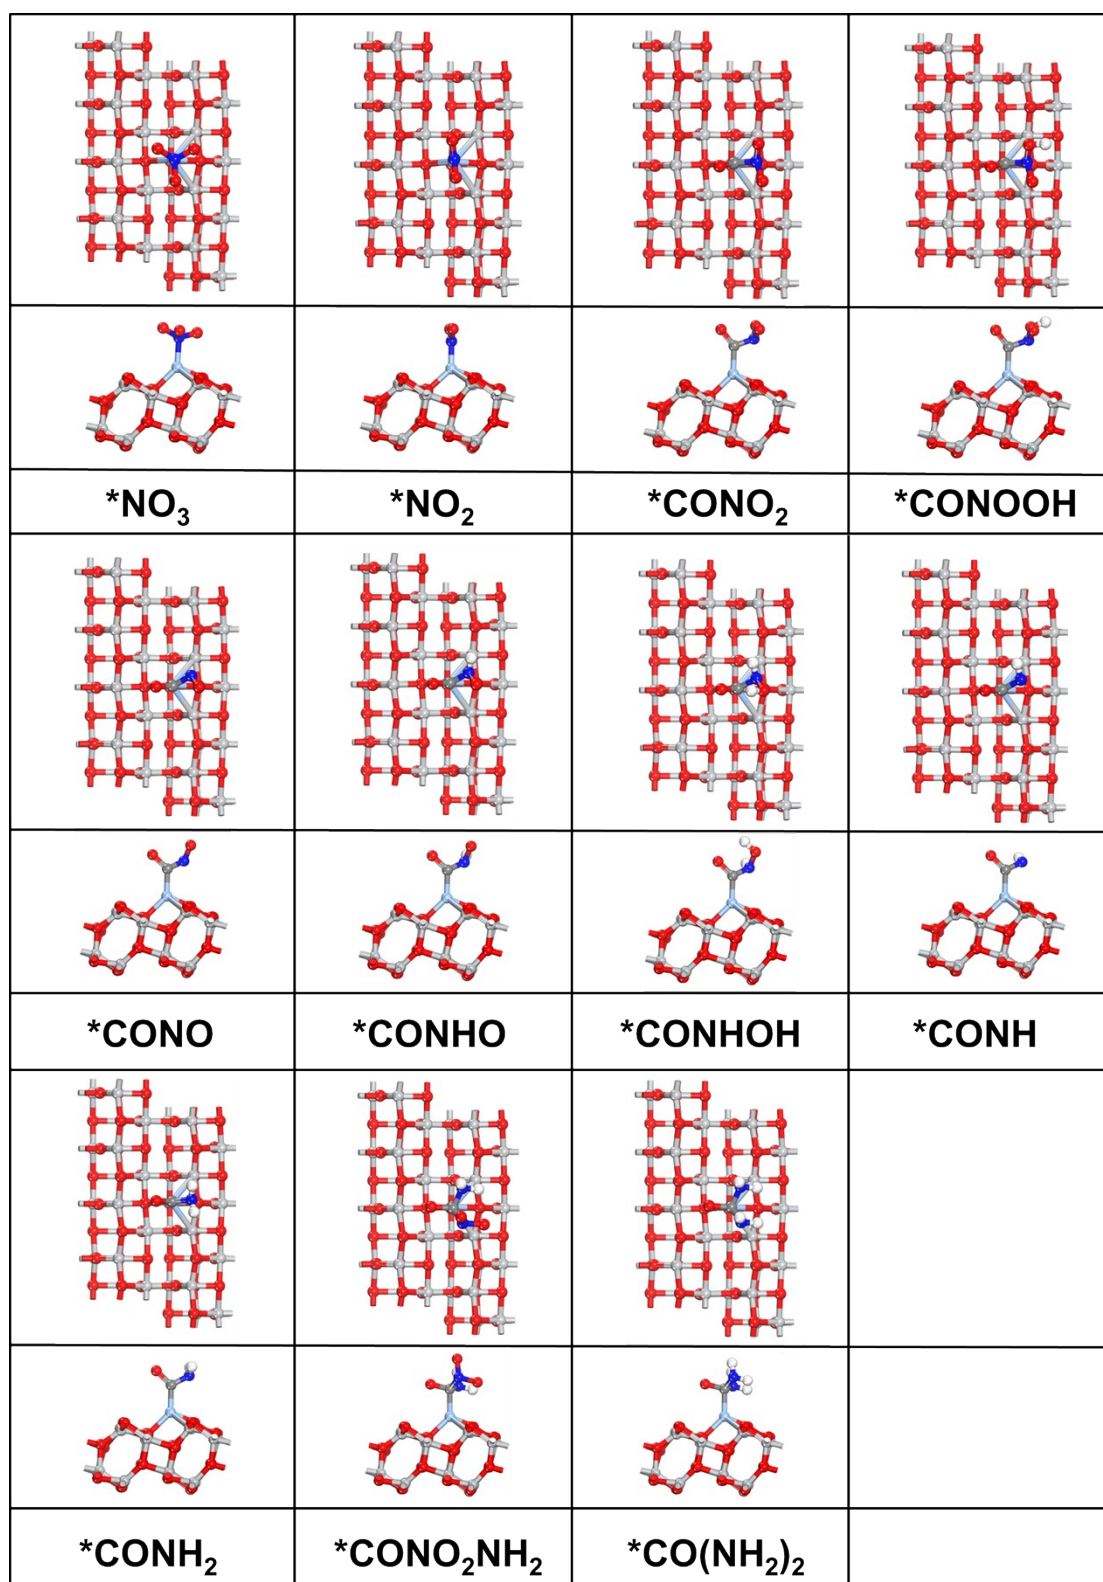

Fig. S33. Optimized structures of the reaction intermediates on Ag<sub>1</sub>/TiO<sub>2</sub> along

$\text{*NO}_3 \rightarrow \text{*CO(NH}_2)_2$  pathway.



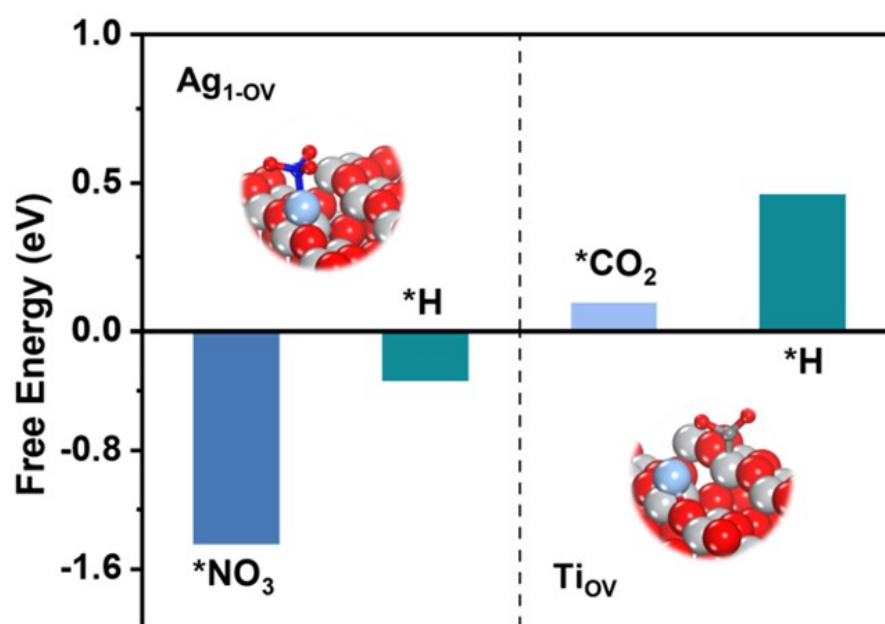

Fig. S34. Binding free energies of \*NO<sub>3</sub> and \*H on Ag<sub>1-ov</sub> as well as \*CO<sub>2</sub> and \*H on TiOV of Ag<sub>1</sub>/TiO<sub>2-x</sub>.

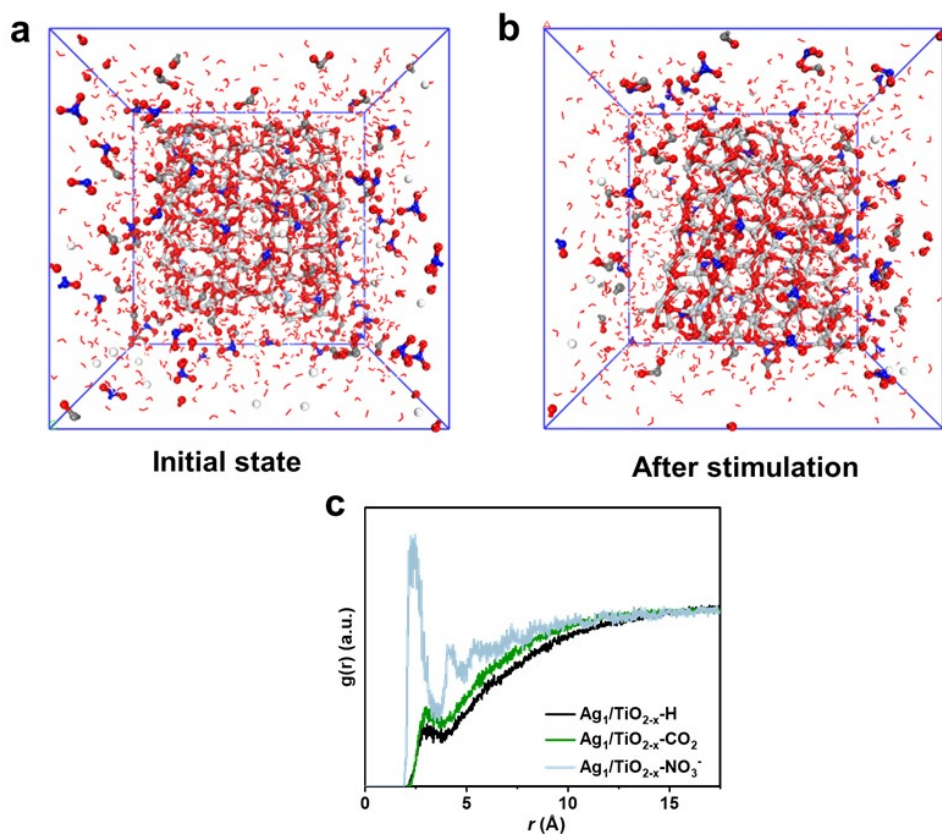

Fig. S35. (a) Initial, (b) final snapshots of the MD simulations of  $\text{NO}_3^-$ ,  $\text{CO}_2$ ,  $\text{H}_2\text{O}$  and H on  $\text{Ag}_1/\text{TiO}_{2-x}$  and corresponding (c) RDF curves of the interactions between  $\text{Ag}_1/\text{TiO}_{2-x}$  and  $\text{NO}_3^-/\text{CO}_2/\text{H}$ .

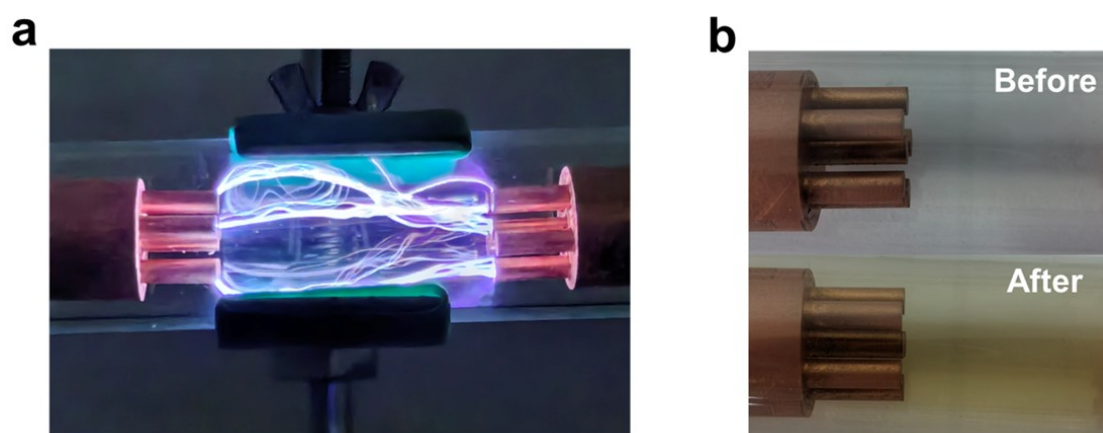

Fig. S36. (a) Photographs for the spark plasma discharge, and (b) corresponding color change in the reaction tube before and after plasma discharge for 10 min.

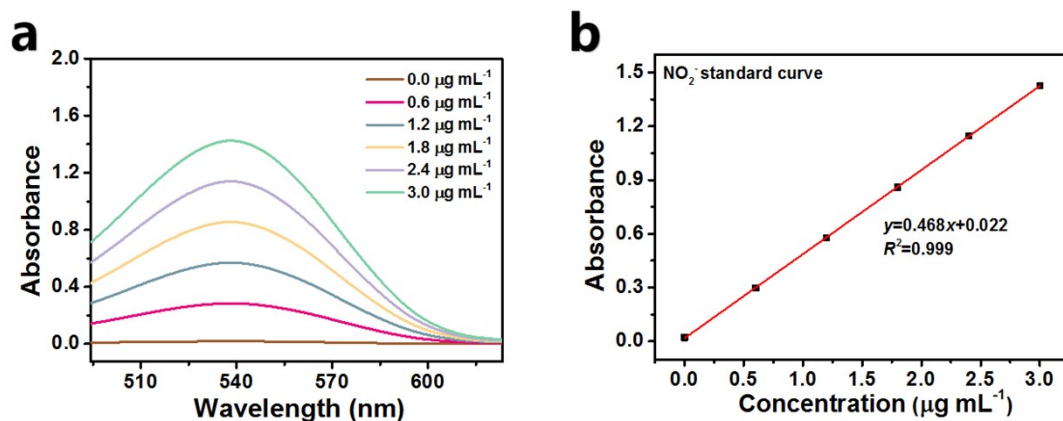

Fig S37. (a) UV-vis absorption spectra of  $\text{NO}_2^-$  assays after incubated for 20 min at ambient conditions. (b) Calibration curve used for calculation of  $\text{NO}_2^-$  concentrations.

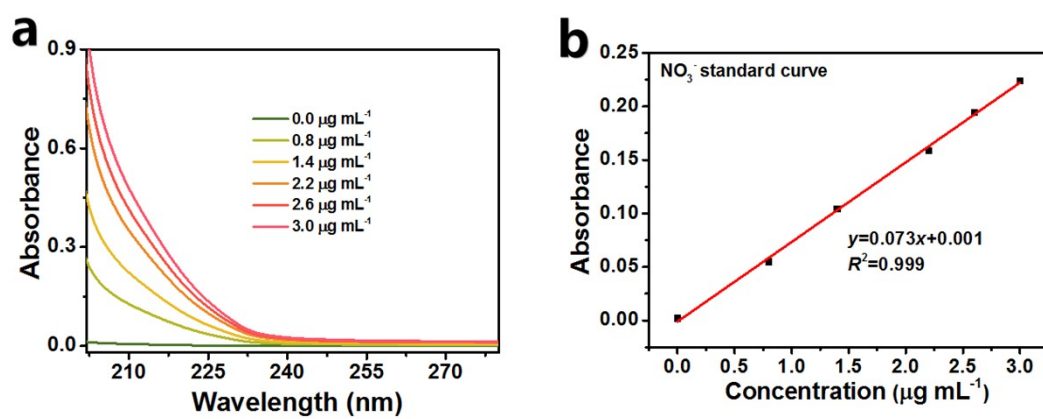

Fig S38. (a) UV-vis absorption spectra of  $\text{NO}_3^-$  assays after incubated for 20 min at ambient conditions. (b) Calibration curve used for calculation of  $\text{NO}_3^-$  concentrations.

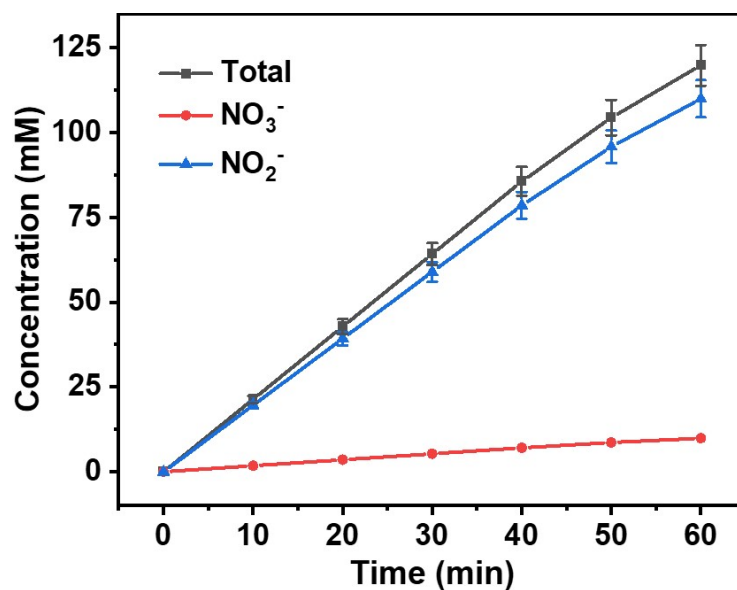

Fig S39. The NO<sub>x</sub><sup>-</sup> concentration at different plasma reaction times.

It is seen that prolonged plasma discharge time linearly enhances NO<sub>x</sub><sup>-</sup> concentration, with NO<sub>2</sub><sup>-</sup> as the dominant species. The persistent NO<sub>2</sub><sup>-</sup> selectivity (90.5%-92%) throughout extended operation underscores the effective alkaline (1.0 M KOH) absorption where high OH<sup>-</sup> concentration kinetically inhibits NO<sub>2</sub><sup>-</sup> oxidation by suppressing the disproportionation reaction.

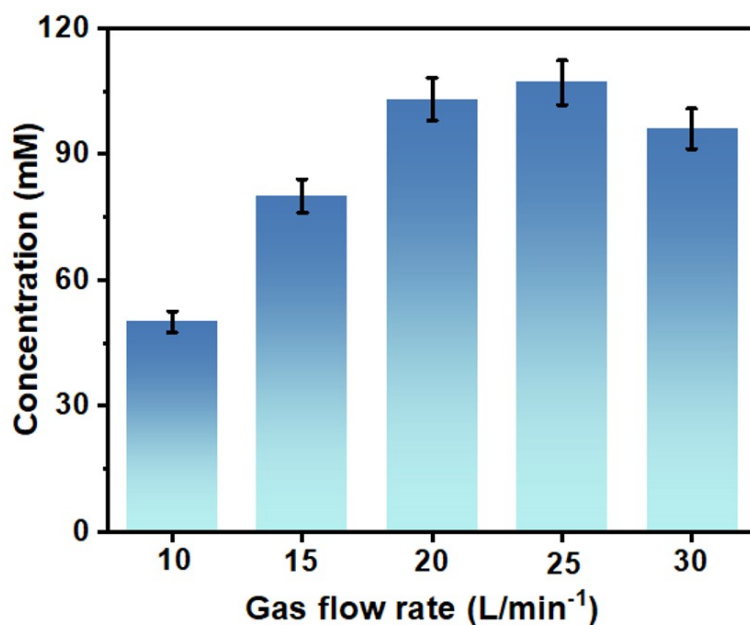

Fig S40. The  $\text{NO}_2^-$  concentration at different gas flow rates.

It is seen that the air flow rate significantly impacts  $\text{NO}_x^-$  yield. At 25  $\text{L/min}$ , the system achieves peak  $\text{NO}_x^-$  yield of 118.8 mM after 60 min. This flow rate balances sufficient residence time for radical interactions and effective heat dissipation to prevent  $\text{NO}_2^-$  degradation. Lower flow rates ( $<15 \text{ L/min}$ ) cause overheating and  $\text{NO}_2^-$  oxidation, while higher flow rates ( $>25 \text{ L/min}$ ) reduce radical collisions and  $\text{NO}_x$  formation efficiency.

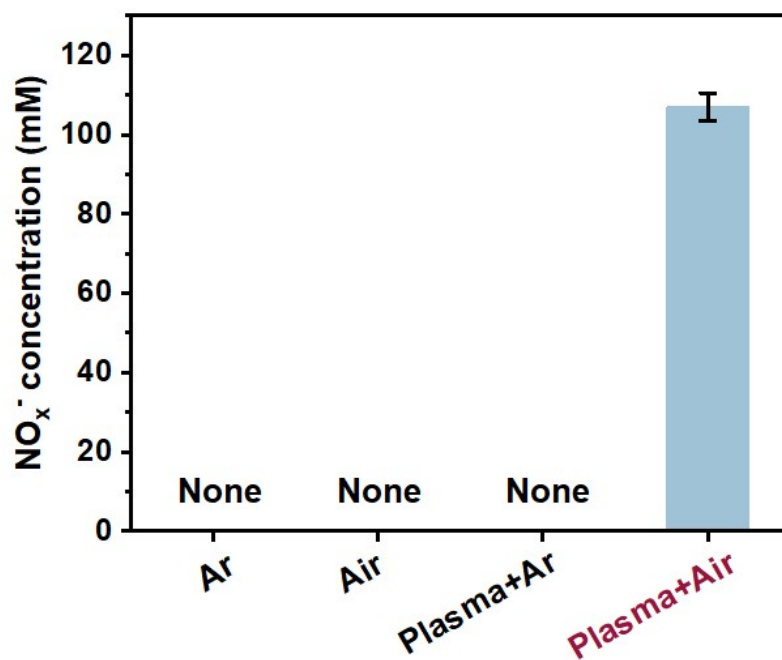

Fig. S41. Amounts of produced  $\text{NO}_x^-$  on under different conditions.

Control experiments confirm that plasma activation is essential, as  $\text{NO}_x^-$  is undetectable under Ar-plasma or non-plasma conditions.



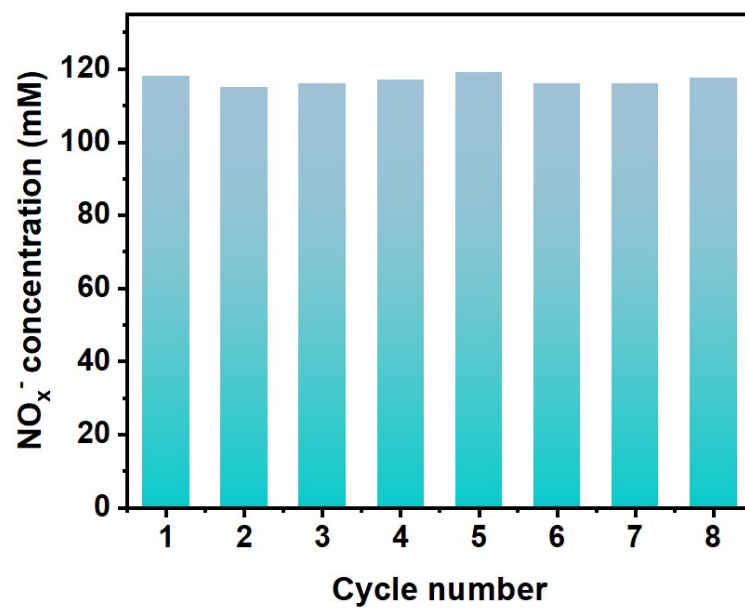

Fig. S42. Cyclic stability tests of plasma-derived  $\text{NO}_x^-$  production (each cycle for 60 min continuous discharge).

Table S1. Ag K-edge EXAFS fitting results of Ag<sub>1</sub>-TiO<sub>2-x</sub>

| Sample                              | Shell | CN  | R (Å) | $\sigma^2$<br>(10 <sup>-3</sup> Å) | $ \Delta E_0 $<br>(eV) | R factor |
|-------------------------------------|-------|-----|-------|------------------------------------|------------------------|----------|
| Ag <sub>1</sub> /TiO <sub>2-x</sub> | Ag-O  | 1.9 | 2.02  | 5.9                                | 7.8                    | 0.009    |

CN is the coordination number, R is interatomic distance,  $\sigma^2$  is Debye-Waller factor,  $\Delta E_0$  is edge-energy shift, R factor is used to value the goodness of the fitting.

Table S2. Comparison of the optimum urea yield rate and  $FE_{\text{urea}}$  for the recently reported state-of-the-art electrocatalysts at ambient conditions.

| Catalyst                                        | N/C source                                                        | Urea yield rate<br>(mmol h <sup>-1</sup> g <sup>-1</sup> ) | $FE_{\text{urea}}$<br>(%) | Potential<br>(V vs REH) | Ref.      |
|-------------------------------------------------|-------------------------------------------------------------------|------------------------------------------------------------|---------------------------|-------------------------|-----------|
| <b>In (OH)<sub>3</sub>-S</b>                    | NO <sub>3</sub> <sup>-</sup> + CO <sub>2</sub>                    | 8.88                                                       | 53.4                      | -0.6 V                  | 7         |
| <b>Fe(a)@C-Fe<sub>3</sub>O<sub>4</sub>/CNTs</b> | NO <sub>3</sub> <sup>-</sup> + CO <sub>2</sub>                    | 22.3                                                       | 16.5                      | -0.65 V                 | 8         |
| <b>Fe-Ni</b>                                    | NO <sub>3</sub> <sup>-</sup> + CO <sub>2</sub>                    | 20.2                                                       | 17.8                      | -1.5 V                  | 9         |
| <b>Vo-CeO<sub>2</sub></b>                       | NO <sub>3</sub> <sup>-</sup> + CO <sub>2</sub>                    | 15.71                                                      | /                         | -1.6 V                  | 1         |
| <b>F-CNT</b>                                    | NO <sub>3</sub> <sup>-</sup> + CO <sub>2</sub>                    | 6.36                                                       | 18                        | -0.65 V                 | 10        |
| <b>m-Cu<sub>2</sub>O</b>                        | NO <sub>3</sub> <sup>-</sup> + CO <sub>2</sub>                    | 29.2                                                       | 9.43                      | -1.3 V                  | 11        |
| <b>Vo-InOOH</b>                                 | NO <sub>3</sub> <sup>-</sup> + CO <sub>2</sub>                    | 9.87                                                       | 51                        | -0.5 V                  | 12        |
| <b>CuWO<sub>4</sub></b>                         | NO <sub>3</sub> <sup>-</sup> + CO <sub>2</sub>                    | 1.64                                                       | 70.1                      | -0.2 V                  | 13        |
| <b>Vo-SiO<sub>2</sub>-6</b>                     | NO <sub>3</sub> <sup>-</sup> + CO <sub>2</sub>                    | 15.16                                                      | 60.6                      | -0.6 V                  | 14        |
| <b>Cu SACs</b>                                  | NO <sub>3</sub> <sup>-</sup> + CO <sub>2</sub>                    | 29.97                                                      | 28                        | -0.9 V                  | 15        |
| <b>MoO<sub>x</sub>/C</b>                        | NO <sub>3</sub> <sup>-</sup> + CO <sub>2</sub>                    | 23.83                                                      | 27.7                      | -0.6 V                  | 16        |
| <b>AgI/TiO<sub>2-x</sub></b>                    | NO <sub>3</sub> <sup>-</sup> + CO <sub>2</sub>                    | <b>61.6</b>                                                | <b>66.1</b>               | -0.7 V                  | This work |
| <b>AgI/TiO<sub>2-x</sub></b>                    | <b>Plasma-derived NO<sub>x</sub><sup>-</sup> + CO<sub>2</sub></b> | <b>74.6</b>                                                | <b>75.7</b>               |                         |           |

Table S3. Comparison of the NO<sub>x</sub><sup>-</sup> yield rate and specific energy consumption for the recently reported state-of-the-art non-thermal plasma.

| Plasma discharge system                                    | Feeding gas | Absorption solution                   | NO <sub>x</sub> <sup>-</sup> yield rate (mmol h <sup>-1</sup> ) | NO <sub>2</sub> <sup>-</sup> Selectivity (%) | SEC (KW h mol <sup>-1</sup> ) | Ref.             |
|------------------------------------------------------------|-------------|---------------------------------------|-----------------------------------------------------------------|----------------------------------------------|-------------------------------|------------------|
| Rotating gliding arc plasma jet                            | Air         | 0.1 M KOH                             | 9.06                                                            | 99.34                                        | 23.18                         | 17               |
| Double reactor glow and spark discharge with Raschig rings | Air         | 0.01 M H <sub>2</sub> SO <sub>4</sub> | 2.97                                                            | 27.03                                        | 3.79                          | 18               |
| Dielectric Barrier Discharge                               | Air         | H <sub>2</sub> O                      | 0.13                                                            | 2.44                                         | 23.08                         | 19               |
| Jet-type plasma                                            | Air         | 1 M NaOH                              | 55.29                                                           | 98.75                                        | 11.18                         | 20               |
| spark discharge                                            | Air         | H <sub>2</sub> O                      | 2.7                                                             | --                                           | 6.3                           | 21               |
| pulsed high-voltage plasma discharge                       | Air         | 1 M NaOH                              | 118.8                                                           | 90.5                                         | 0.857                         | <b>This work</b> |

## References

1. X. Wei, X. Wen, Y. Liu, C. Chen, C. Xie, D. Wang, M. Qiu, N. He, P. Zhou and W. Chen, *J. Am. Chem. Soc.*, 2022, **144**, 11530-11535.
2. P. Li, Z. Jin, Z. Fang and G. Yu, *Energy Environ. Sci.*, 2021, **14**, 3522-3531.
3. Z.-Y. Wu, M. Karamad, X. Yong, Q. Huang, D. A. Cullen, P. Zhu, C. Xia, Q. Xiao, M. Shakouri and F.-Y. Chen, *Nat. Commun.*, 2021, **12**, 2870.
4. L. C. Green, D. A. Wagner, J. Glogowski, P. L. Skipper, J. S. Wishnok and S. R. Tannenbaum, *Anal. Biochem.*, 1982, **126**, 131-138.
5. Q. Jiang, Z. Ao and Q. Jiang, *Phys. Chem. Chem. Phys.*, 2013, **15**, 10859-10865.
6. X. Li, P. Shen, Y. Luo, Y. Li, Y. Guo, H. Zhang and K. Chu, *Angew. Chem. Int. Ed.*, 2022, **134**, e202205923.
7. C. Lv, L. Zhong, H. Liu, Z. Fang, C. Yan, M. Chen, Y. Kong, C. Lee, D. Liu and S. Li, *Nat. Sustain.*, 2021, **4**, 868-876.
8. J. Geng, S. Ji, M. Jin, C. Zhang, M. Xu, G. Wang, C. Liang and H. Zhang, *Angew. Chem. Int. Ed.*, 2023, **62**, e202210958.
9. X. Zhang, X. Zhu, S. Bo, C. Chen, M. Qiu, X. Wei, N. He, C. Xie, W. Chen and J. Zheng, *Nat. Commun.*, 2022, **13**, 5337.
10. X. Liu, P. V. Kumar, Q. Chen, L. Zhao, F. Ye, X. Ma, D. Liu, X. Chen, L. Dai and C. Hu, *Appl. Catal. B Environ.*, 2022, **316**, 121618.
11. M. Qiu, X. Zhu, S. Bo, K. Cheng, N. He, K. Gu, D. Song, C. Chen, X. Wei and D. Wang, *CCS Chem.*, 2023, **5**, 2617-2627.
12. C. Lv, C. Lee, L. Zhong, H. Liu, J. Liu, L. Yang, C. Yan, W. Yu, H. H. Hng and Z. Qi, *ACS Nano*, 2022, **16**, 8213-8222.
13. Y. Zhao, Y. Ding, W. Li, C. Liu, Y. Li, Z. Zhao, Y. Shan, F. Li, L. Sun and F. Li, *Nat. Commun.*, 2023, **14**, 4491.
14. Z. Li, P. Zhou, M. Zhou, H. Jiang, H. Li, S. Liu, H. Zhang, S. Yang and Z. Zhang, *Appl. Catal. B Environ.*, 2023, **338**, 122962.
15. J. Leverett, T. Tran-Phu, J. A. Yuwono, P. Kumar, C. Kim, Q. Zhai, C. Han, J. Qu, J. Cairney and A. N. Simonov, *Adv. Energy Mater.*, 2022, **12**, 2201500.
16. M. Sun, G. Wu, J. Jiang, Y. Yang, A. Du, L. Dai, X. Mao and Q. Qin, *Angew. Chem.*, 2023, **135**, e202301957.
17. A. Wu, J. Yang, B. Xu, X.-Y. Wu, Y. Wang, X. Lv, Y. Ma, A. Xu, J. Zheng and Q. Tan, *Appl. Catal. B Environ.*, 2021, **299**, 120667.
18. J. Sun, D. Alam, R. Daiyan, H. Masood, T. Zhang, R. Zhou, P. J. Cullen, E. C. Lovell, A. R. Jalili and R. Amal, *Energy Environ. Sci.*, 2021, **14**, 865-872.
19. L. Sivachandiran and A. Khacef, *RSC Adv.*, 2017, **7**, 1822-1832.
20. Z. Meng, J. X. Yao, C. N. Sun, X. Kang, R. Gao, H. R. Li, B. Bi, Y. F. Zhu, J. M. Yan and Q. Jiang, *Adv. Energy Mater.*, 2022, **12**, 2202105.
21. J. Sun, R. Zhou, J. Hong, Y. Gao, Z. Qu, Z. Liu, D. Liu, T. Zhang, R. Zhou and K. K. Ostrikov, *Appl. Catal. B Environ.*, 2024, **342**, 123426.
